# Supplementary material
Source: bioRxiv or medRxiv preprint supplement (https://medrxiv.org/highwire/filestream/68620/field_highwire_adjunct_files/11/19003012-9.pdf)
Supplement: Supplementary file [file 19003012-9.pdf]

sex: 1

ACT-DTH

EST-DTH

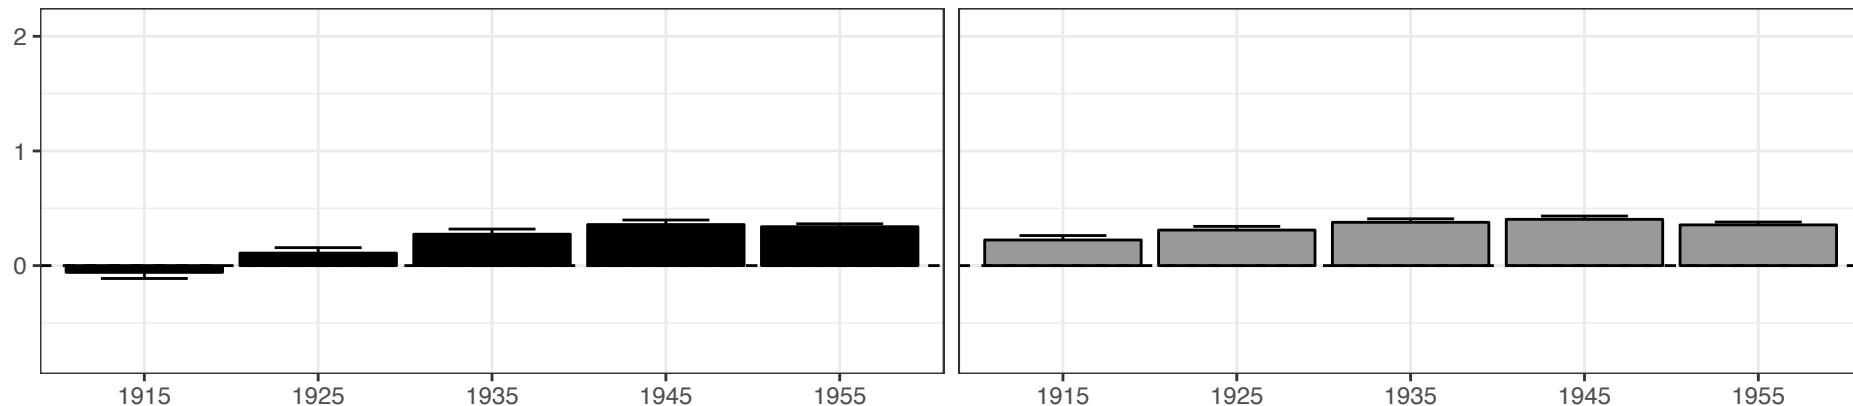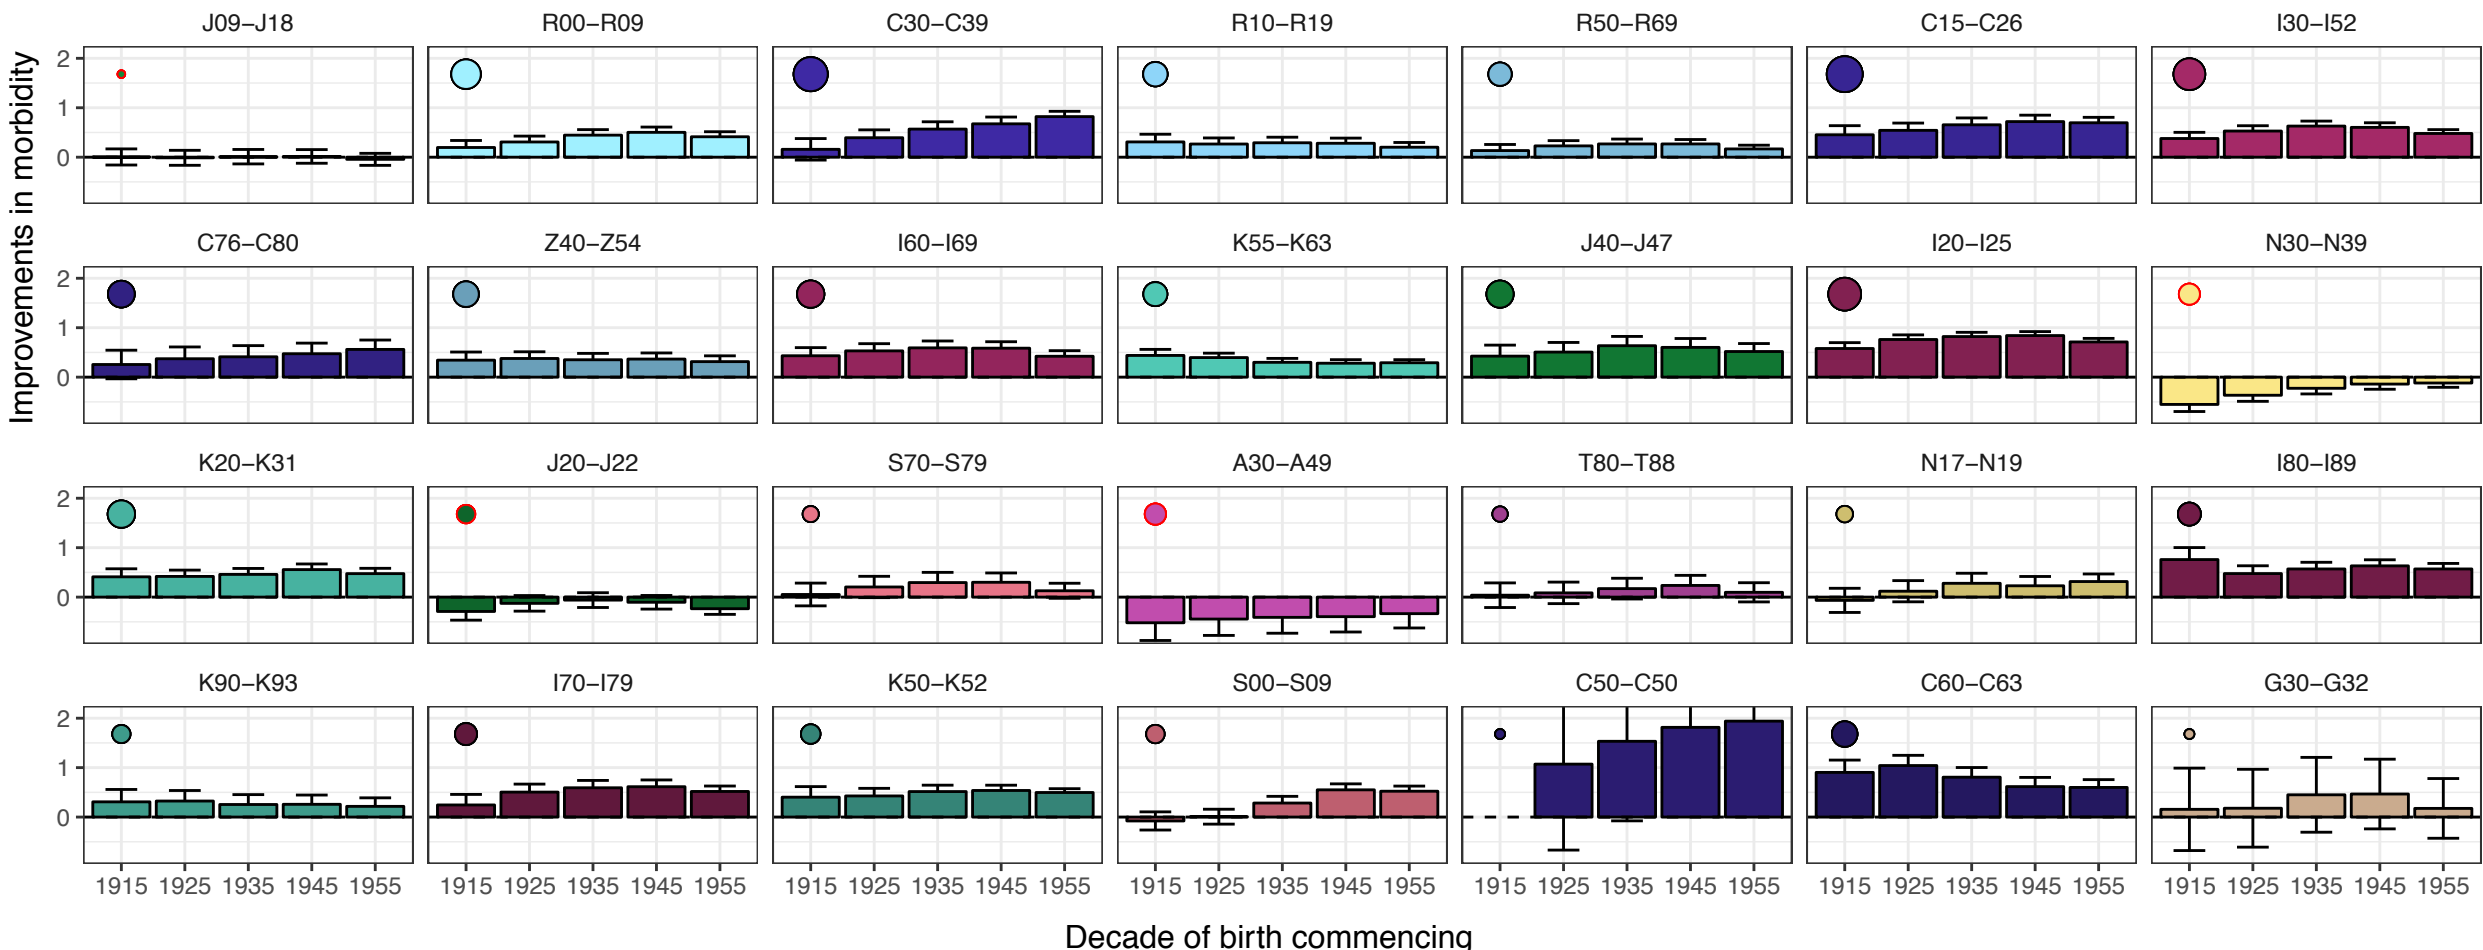

sex: 2

ACT-DTH

EST-DTH

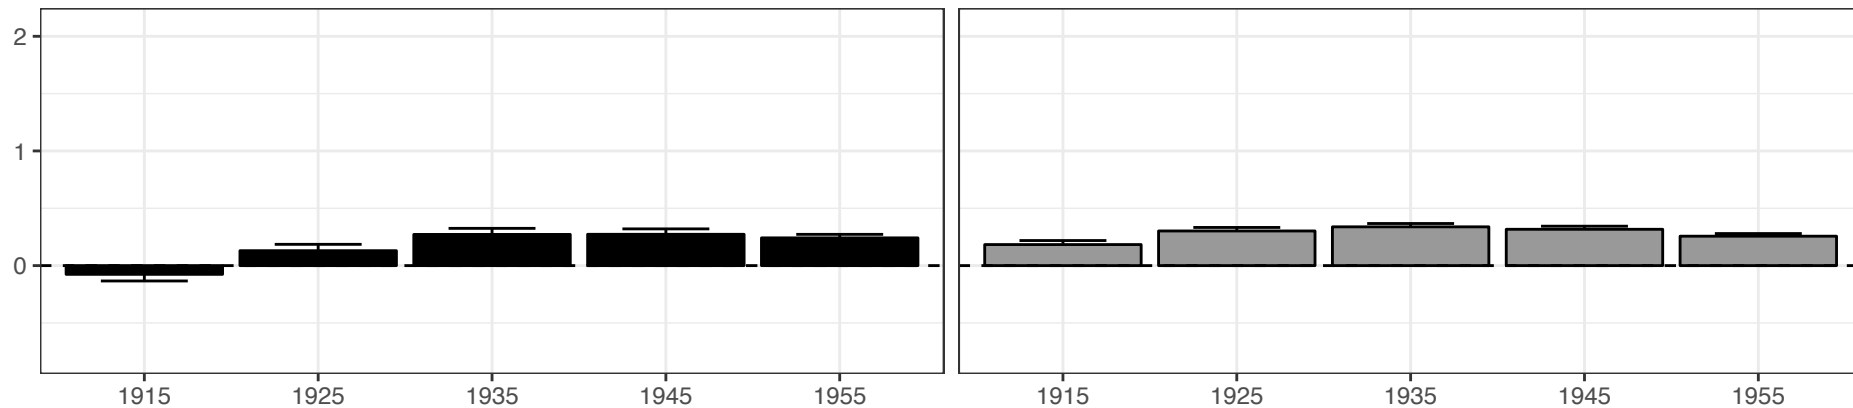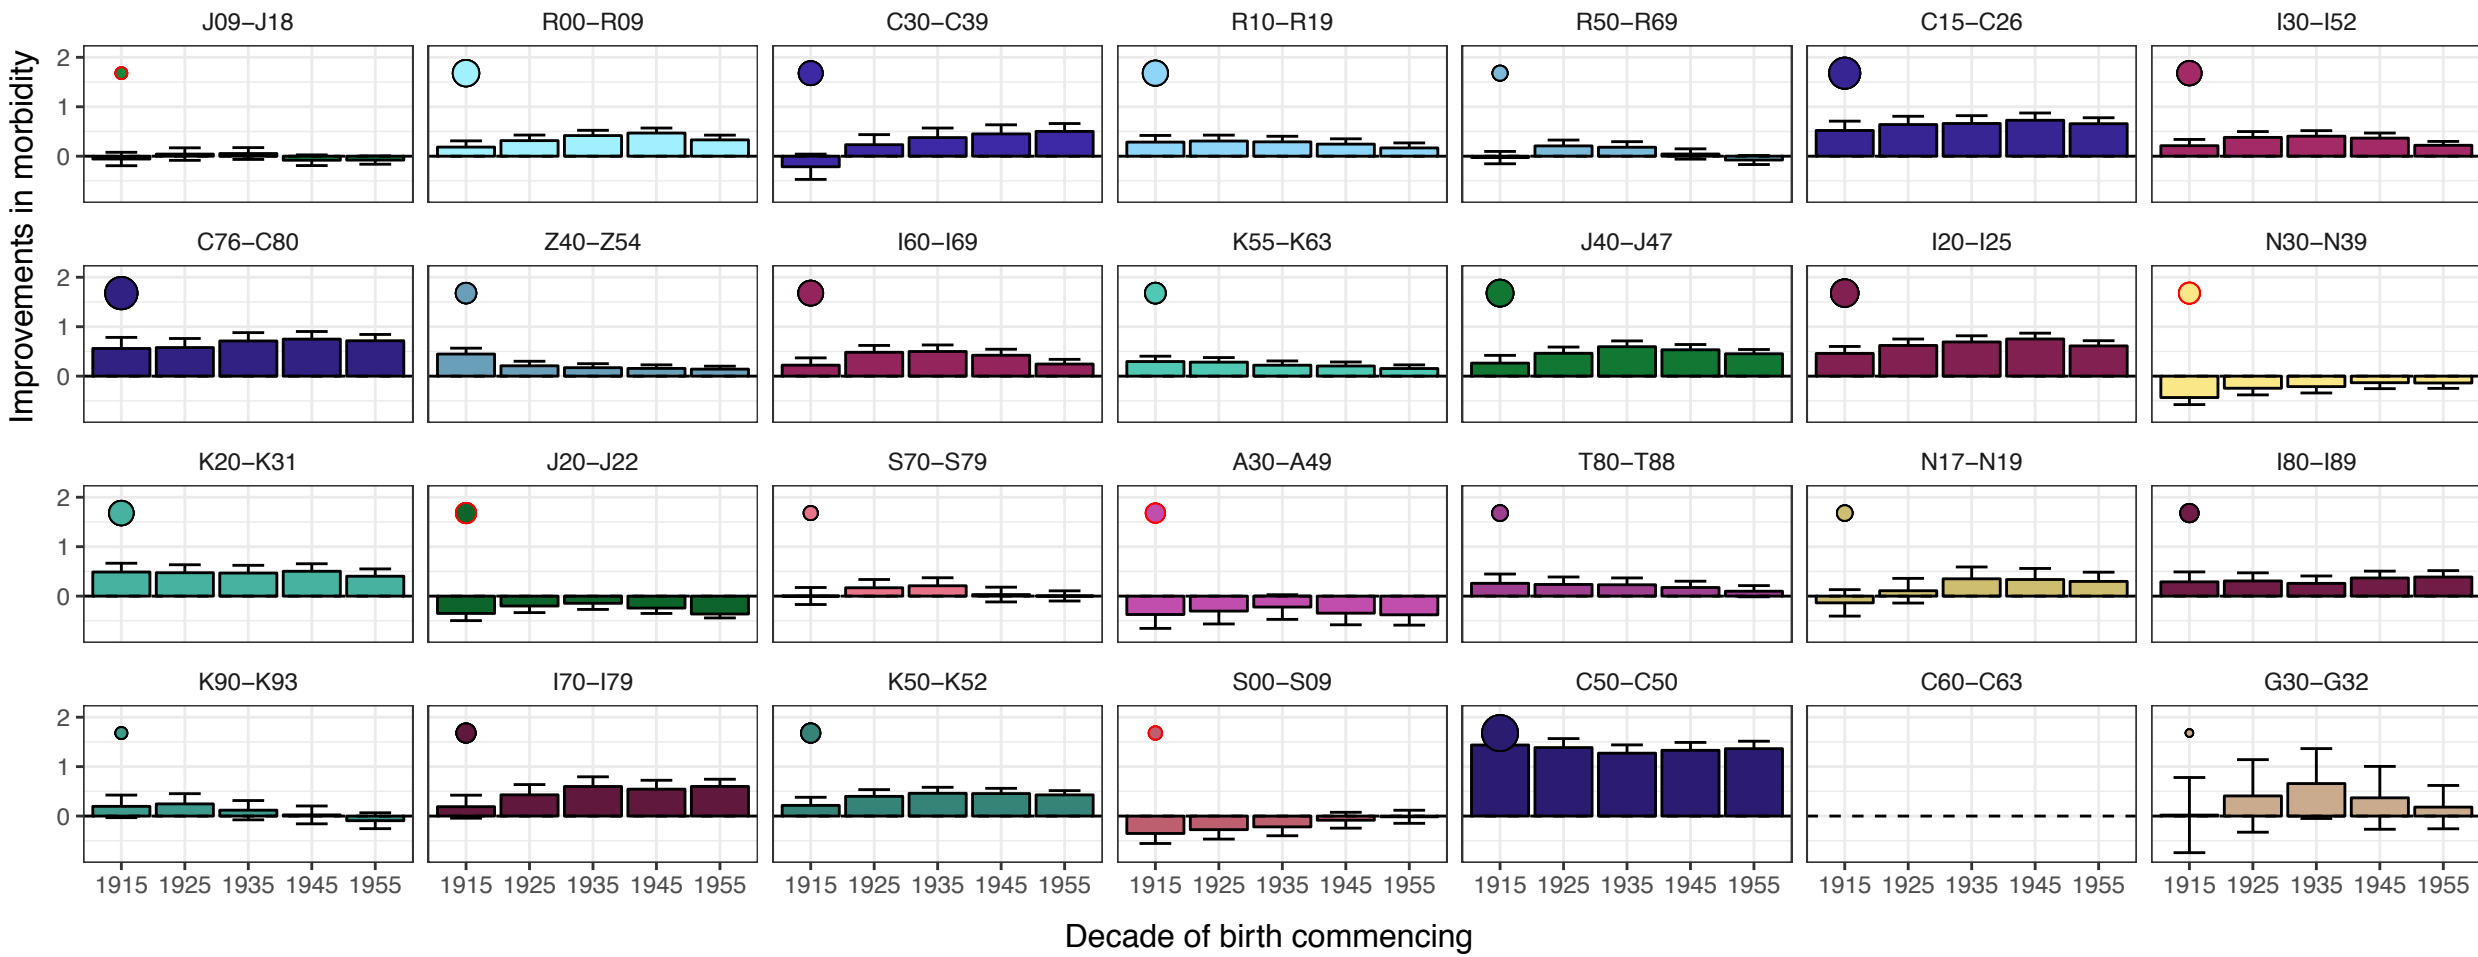

deprivation: 1

ACT-DTH

EST-DTH

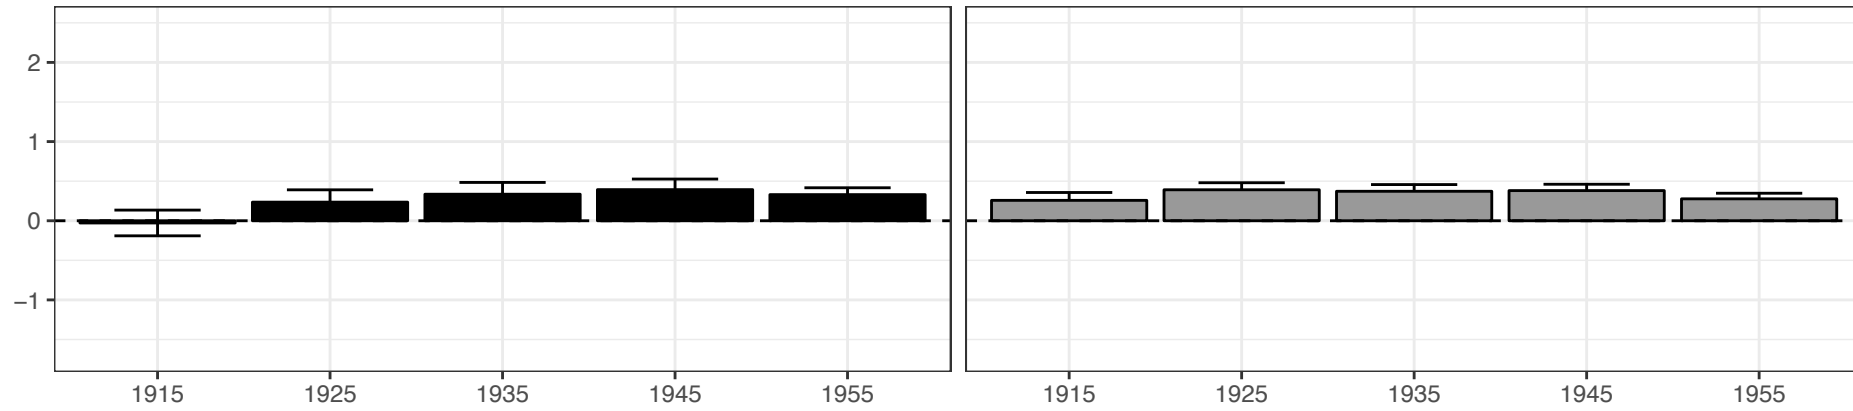

Improvements in morbidity

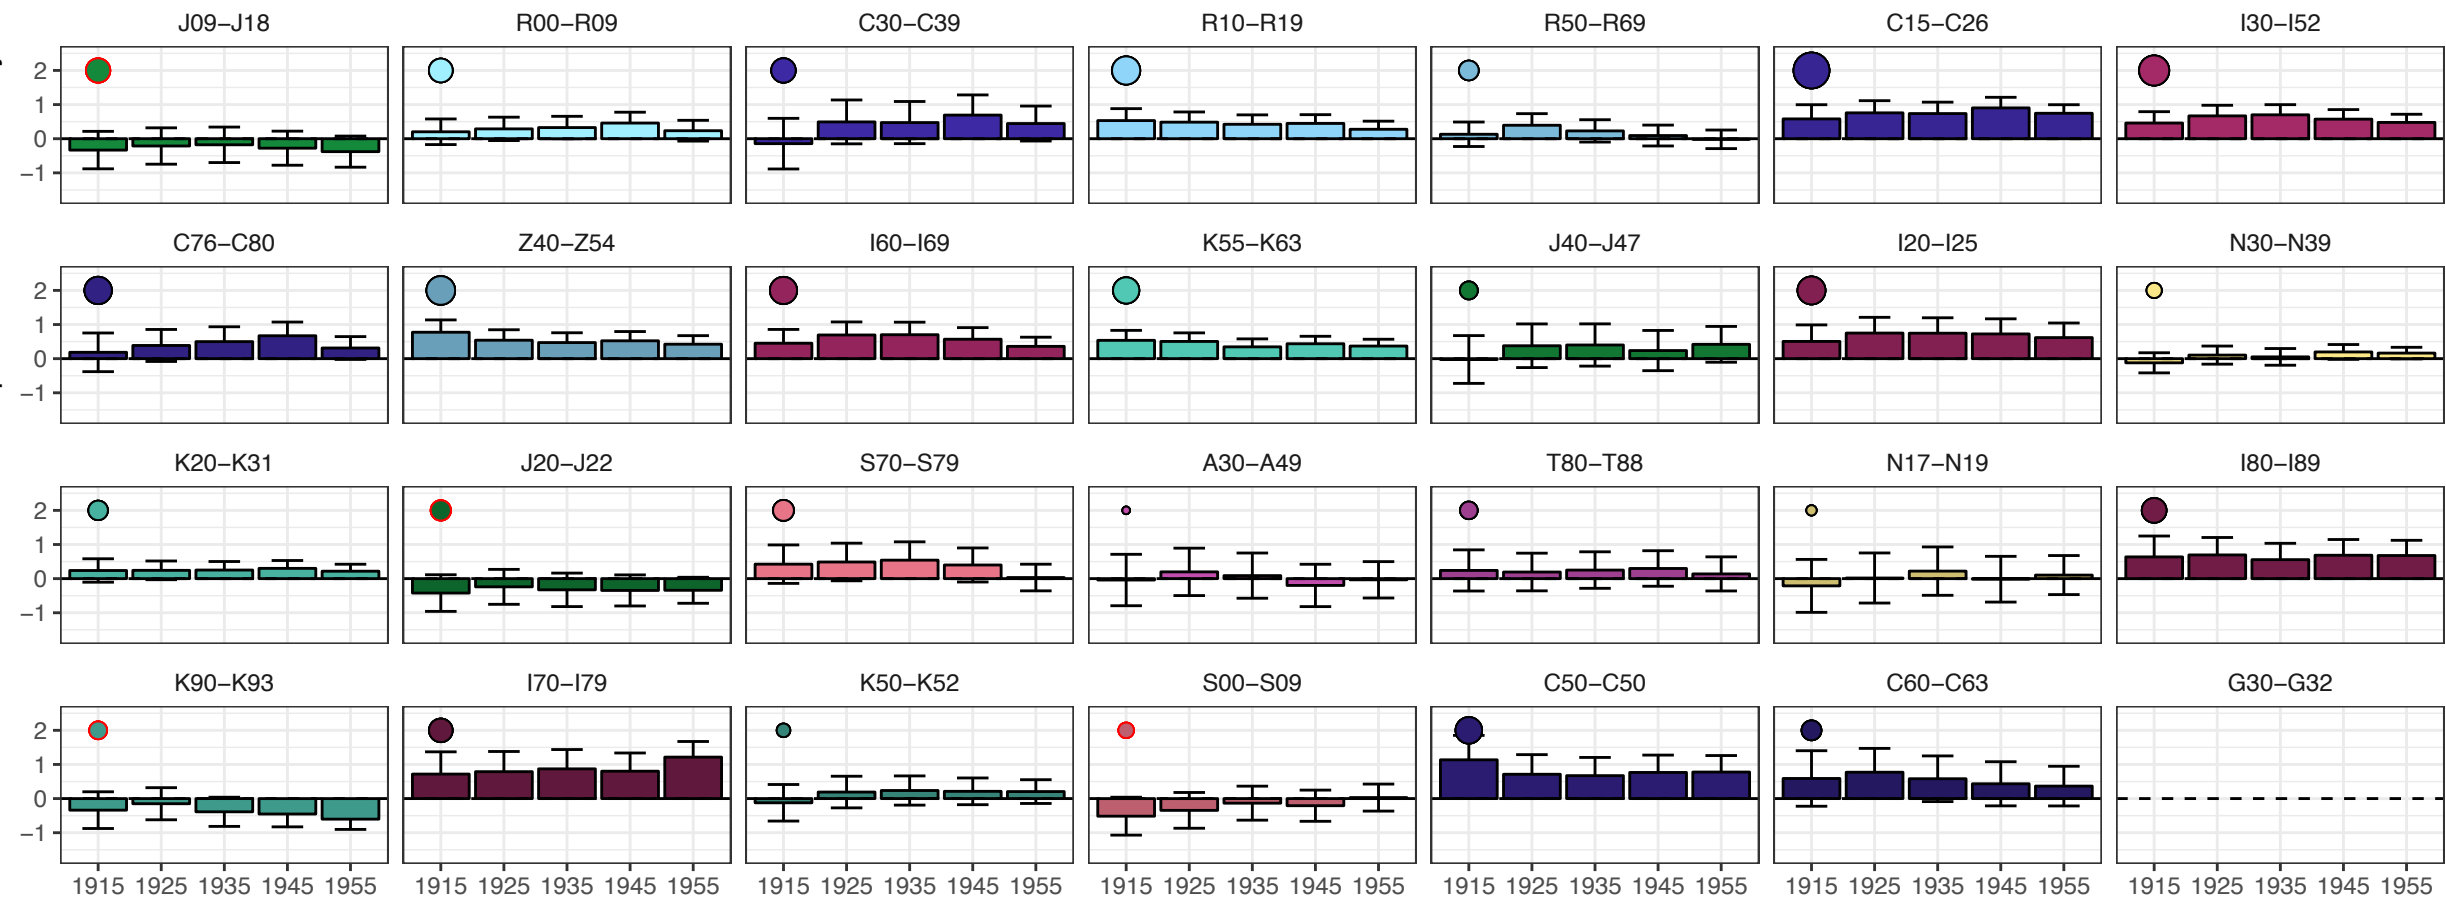

Decade of birth commencing

ACT-DTH

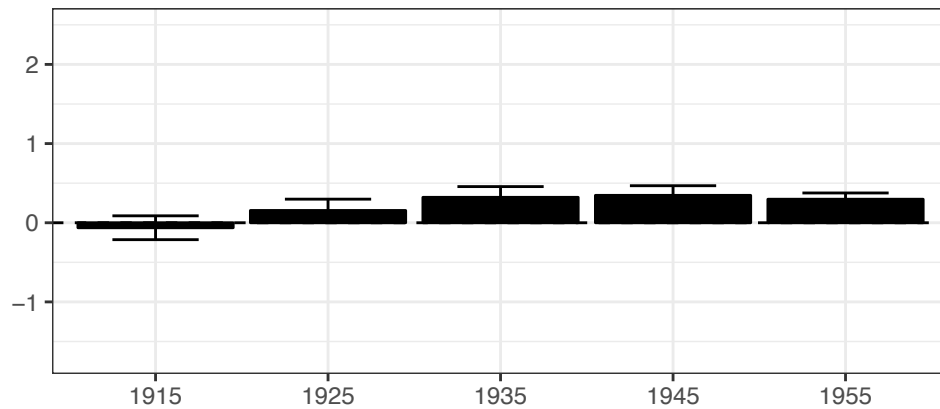

EST-DTH

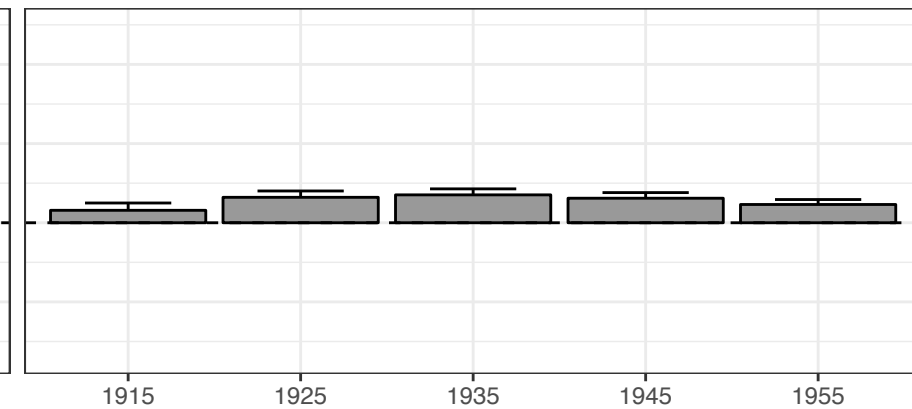

Improvements in morbidity

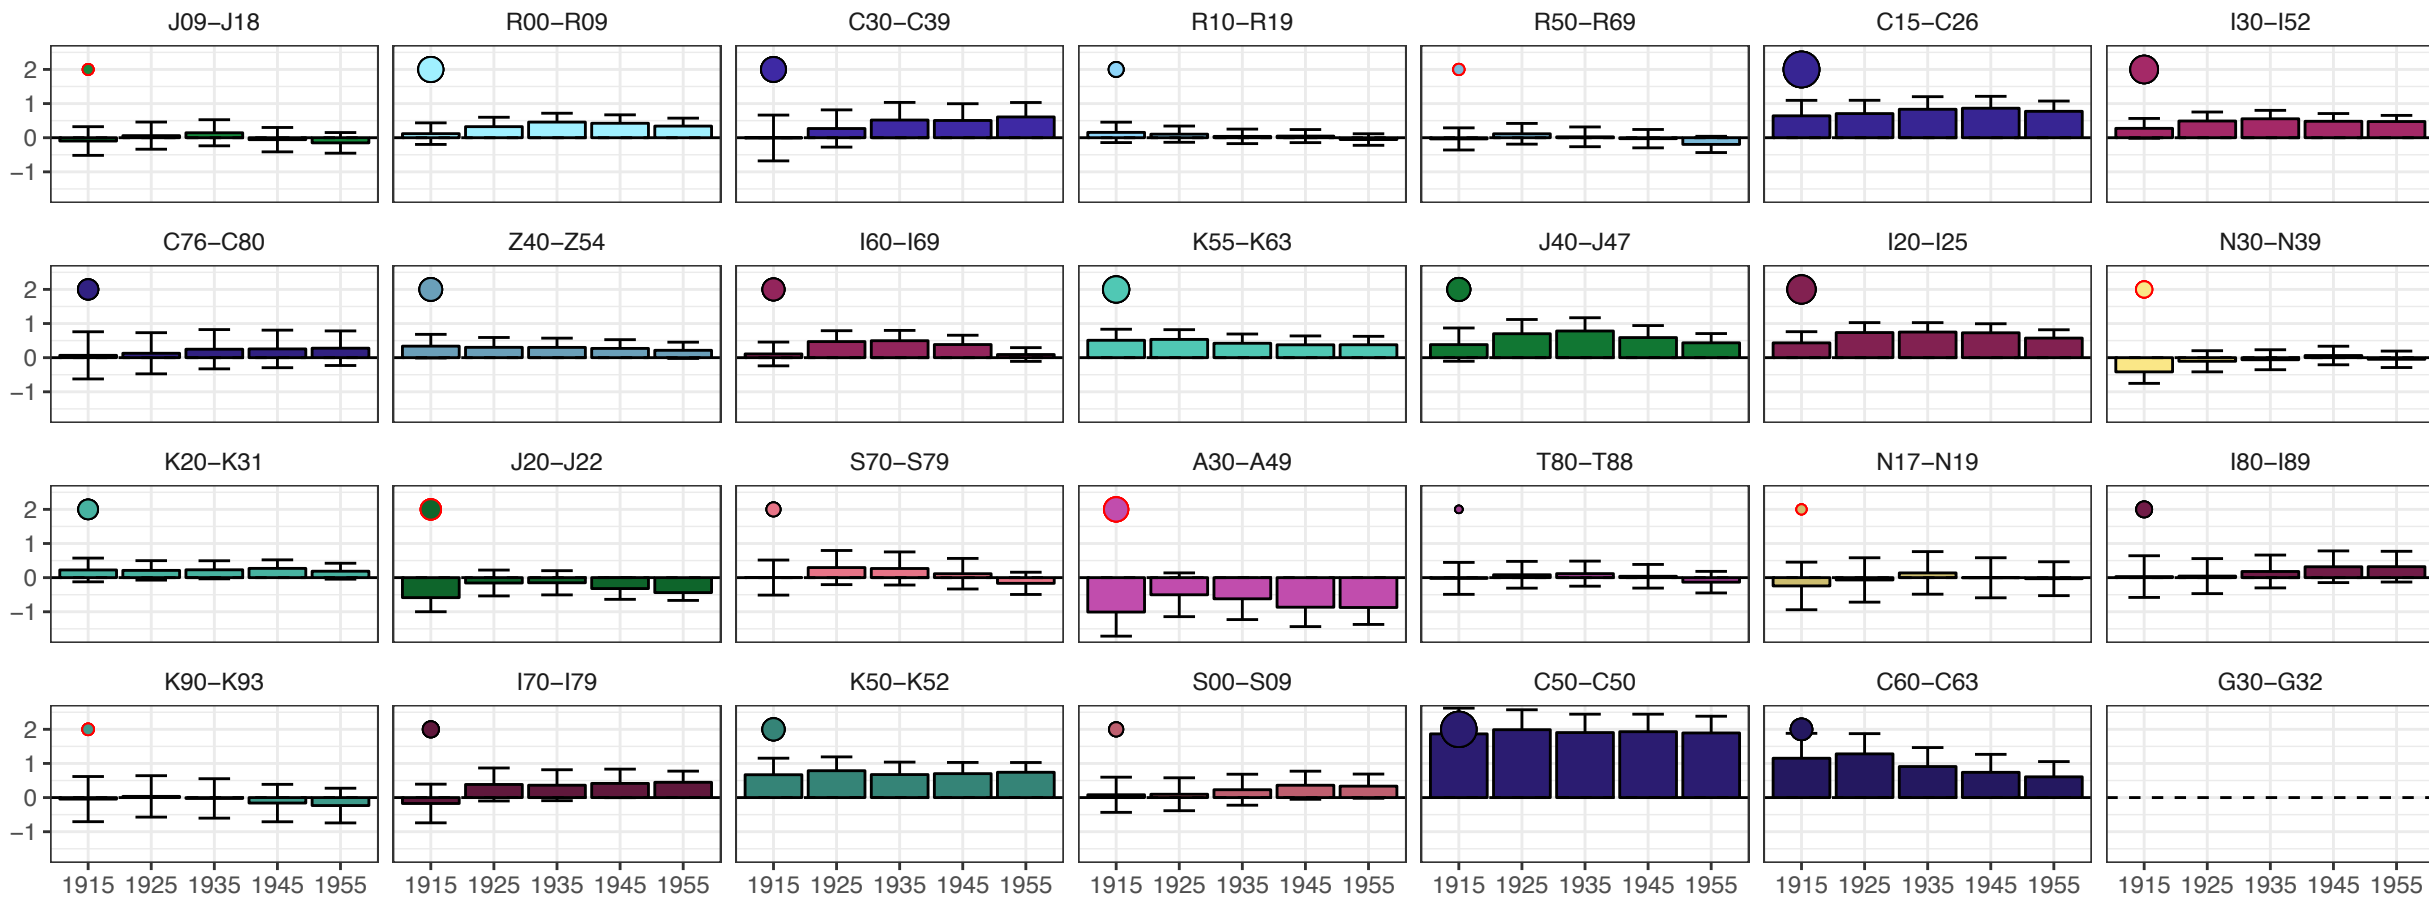

ACT-DTH

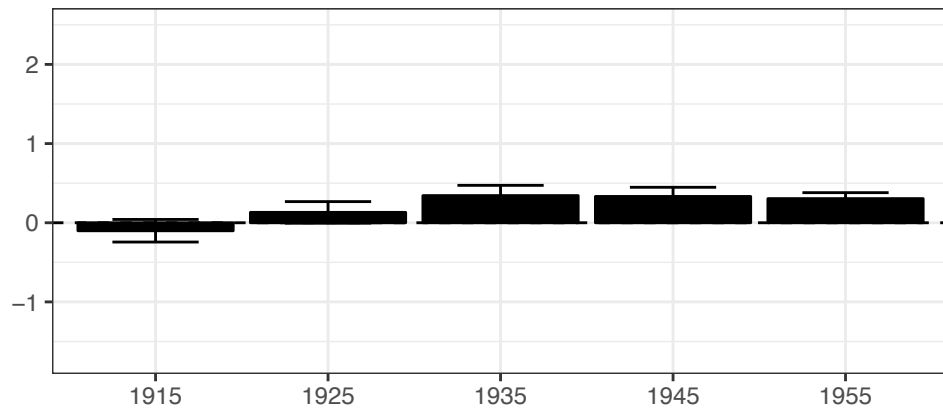

EST-DTH

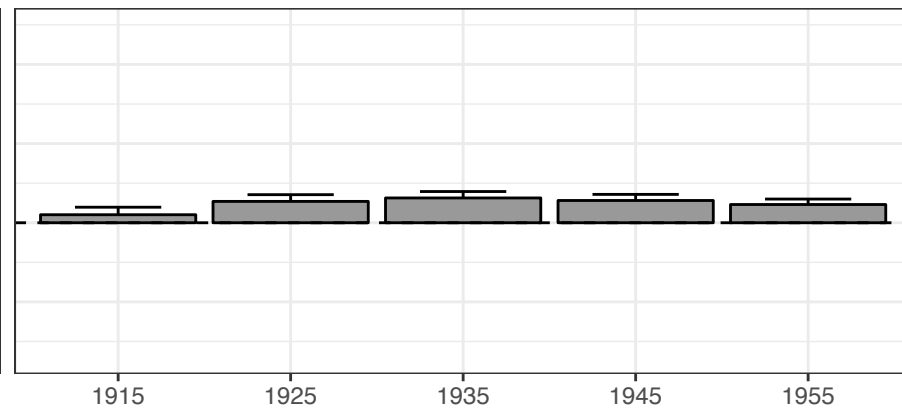

Improvements in morbidity

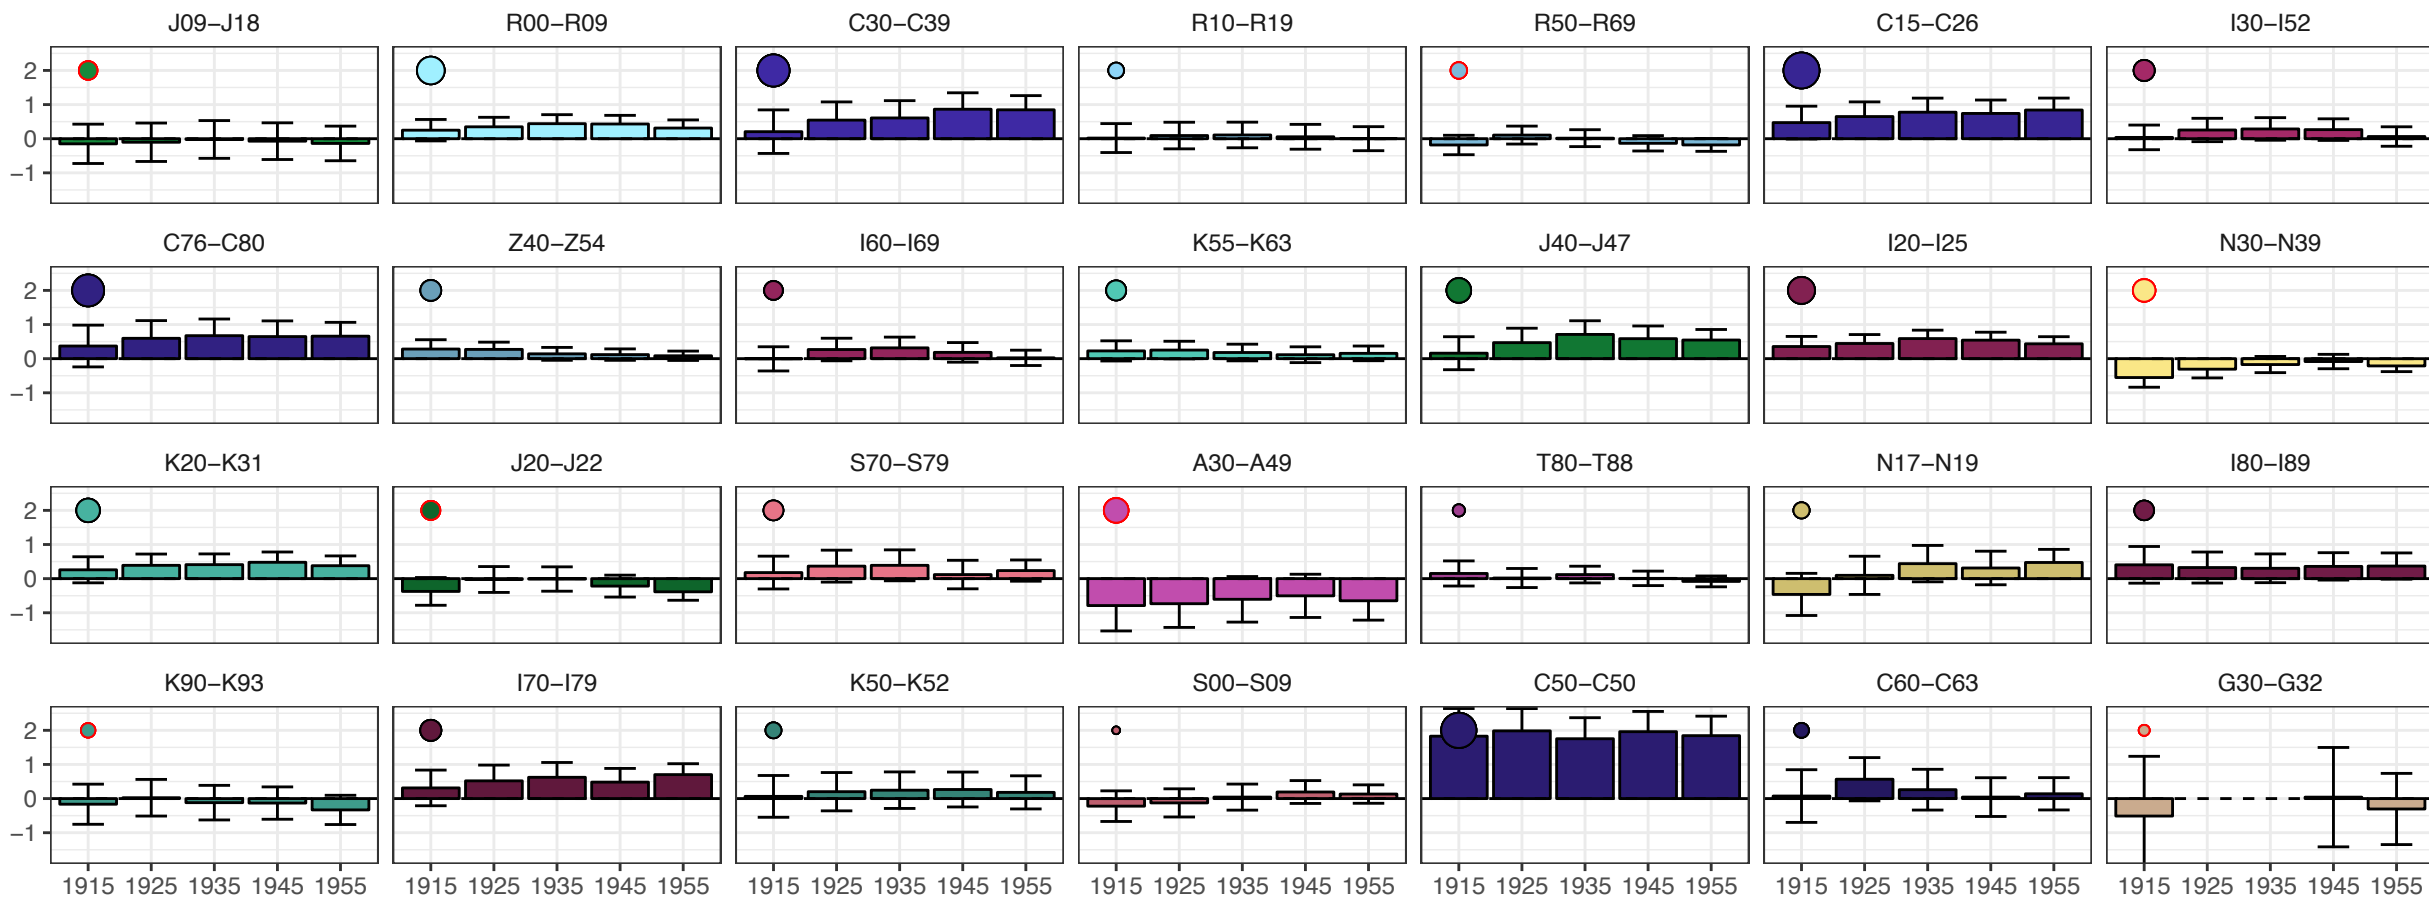

Decade of birth commencing

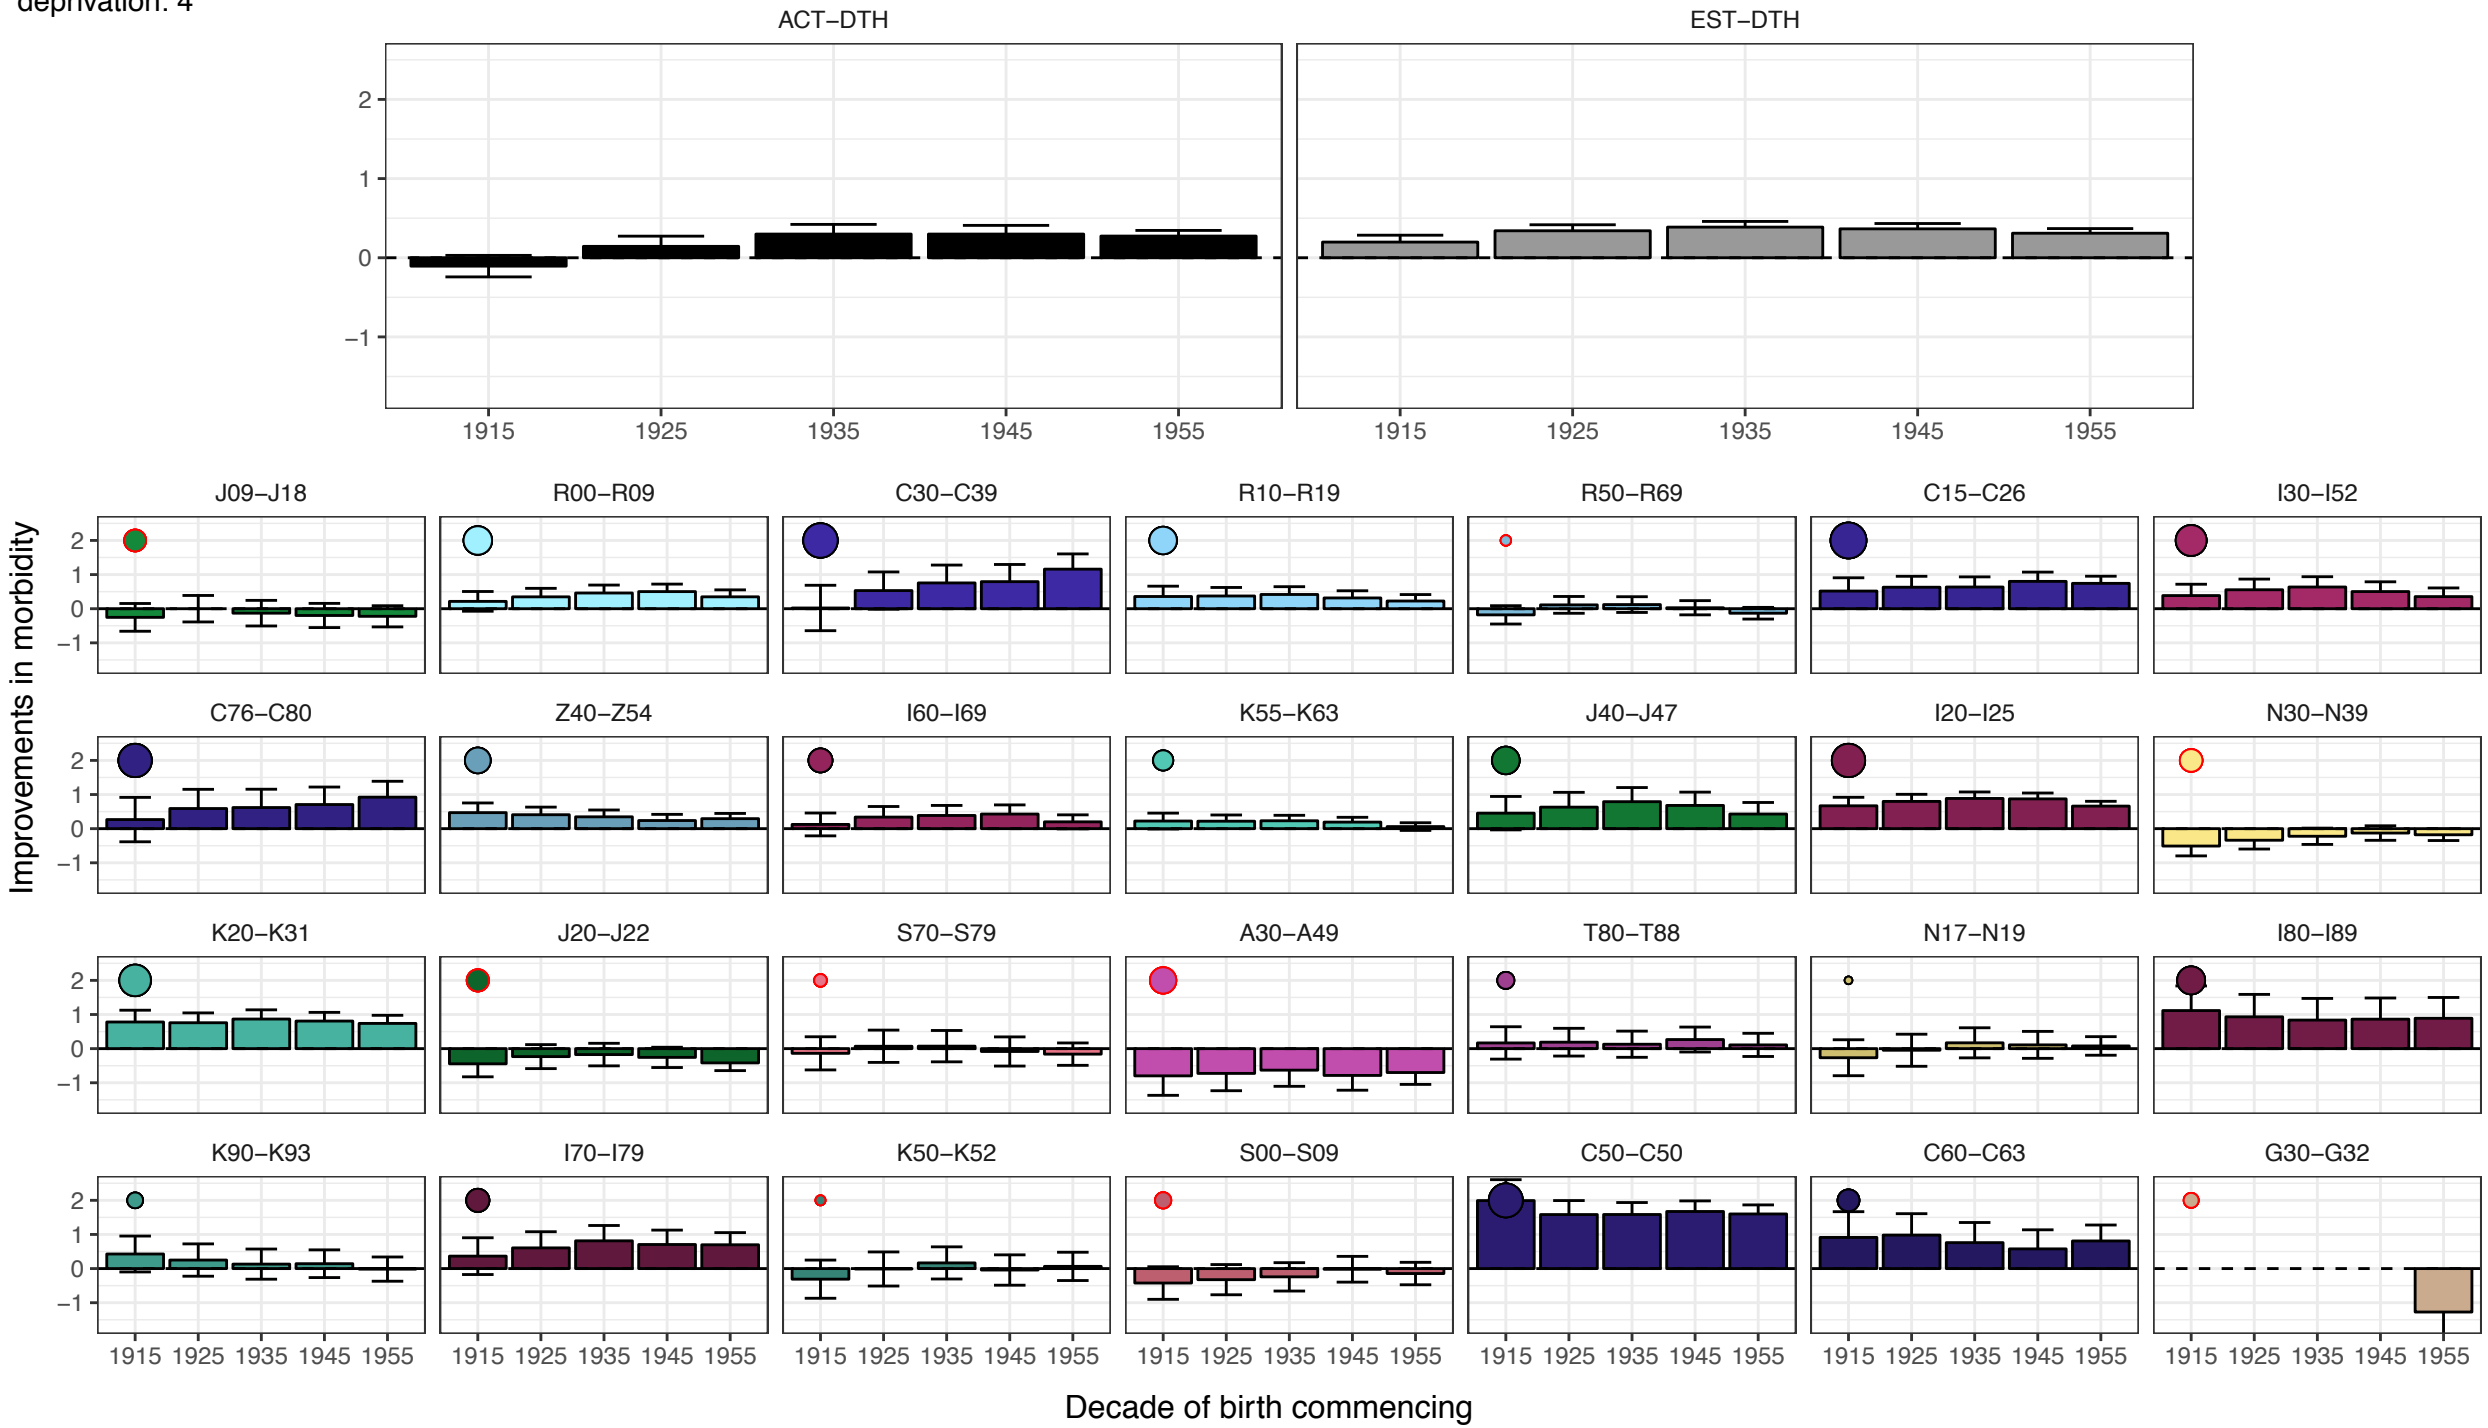

deprivation: 5

ACT-DTH

EST-DTH

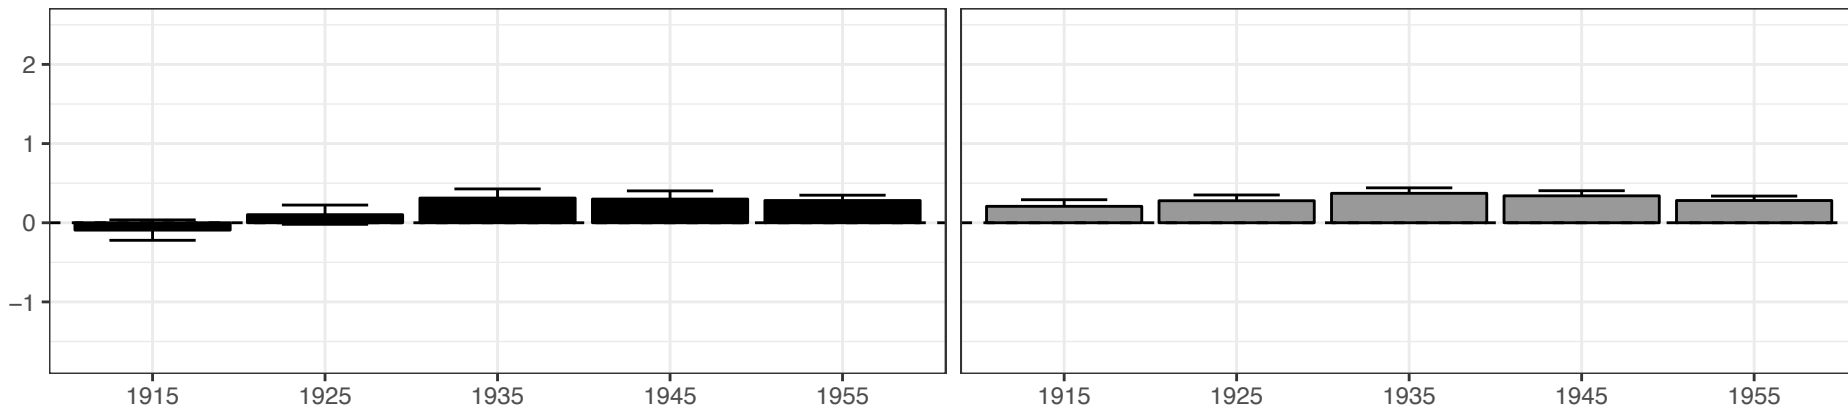

Improvements in morbidity

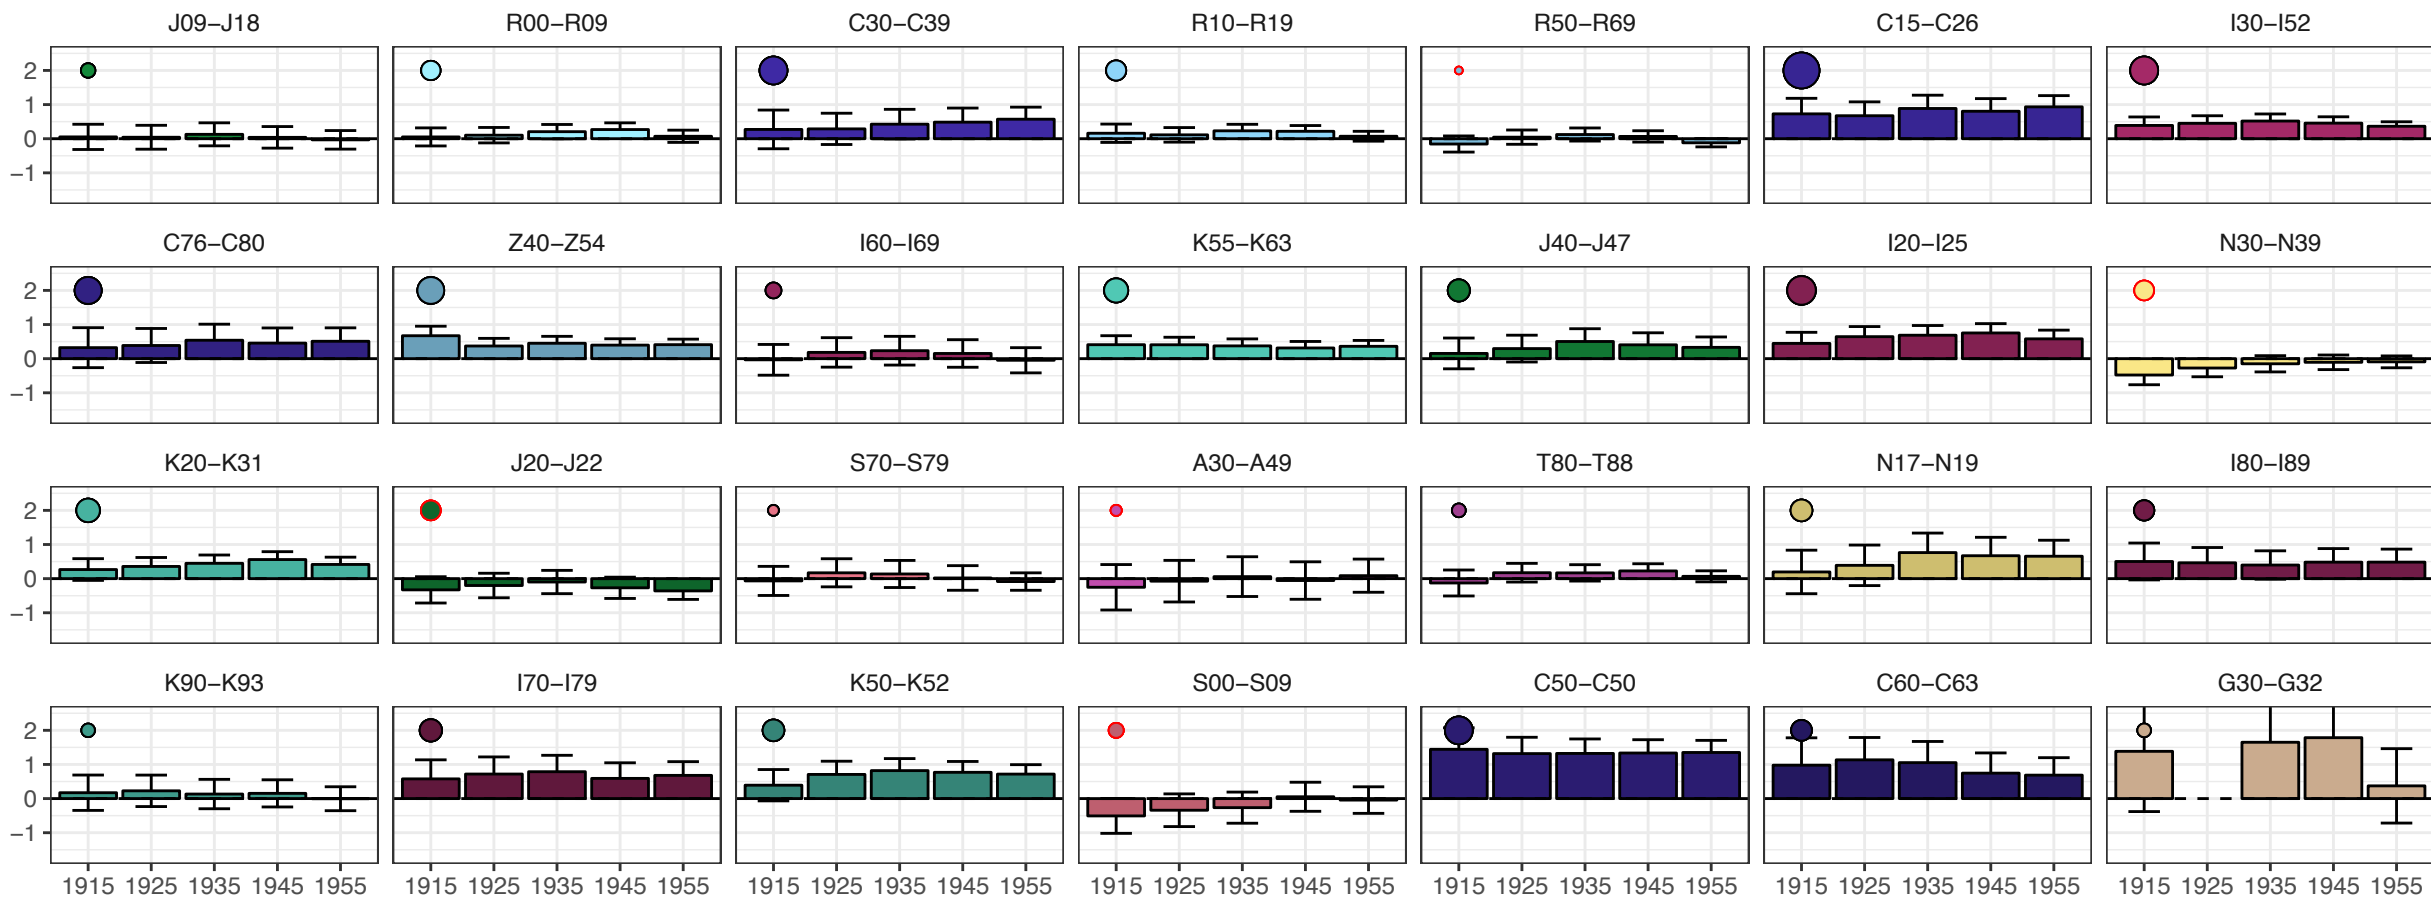

Decade of birth commencing

deprivation: 6

ACT-DTH

EST-DTH

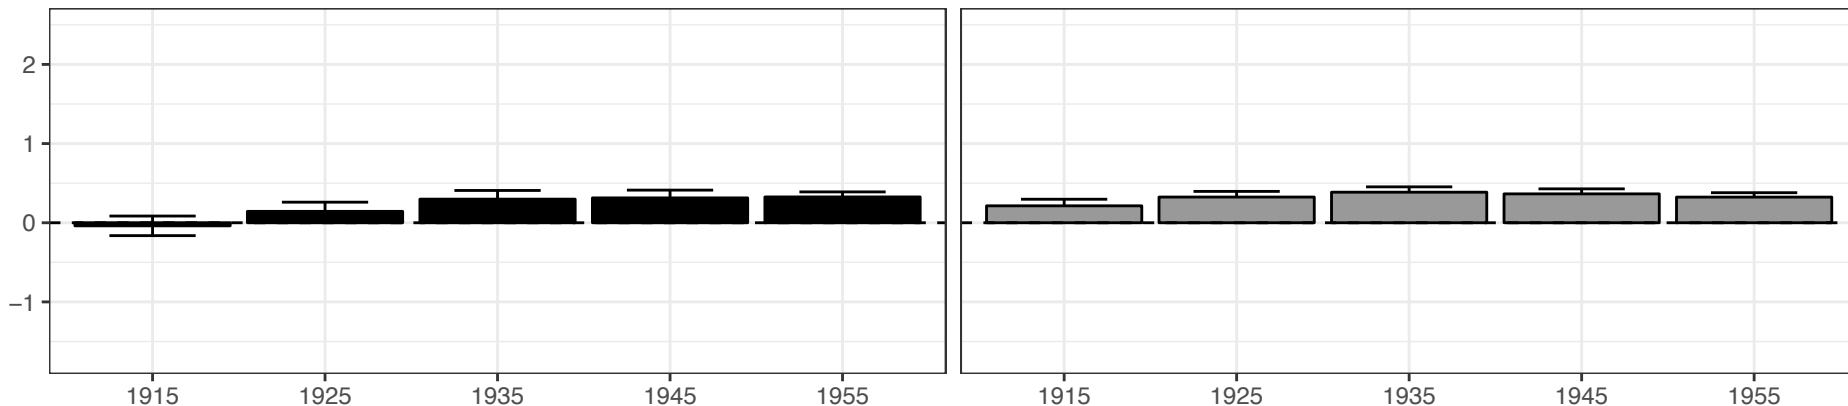

Improvements in morbidity

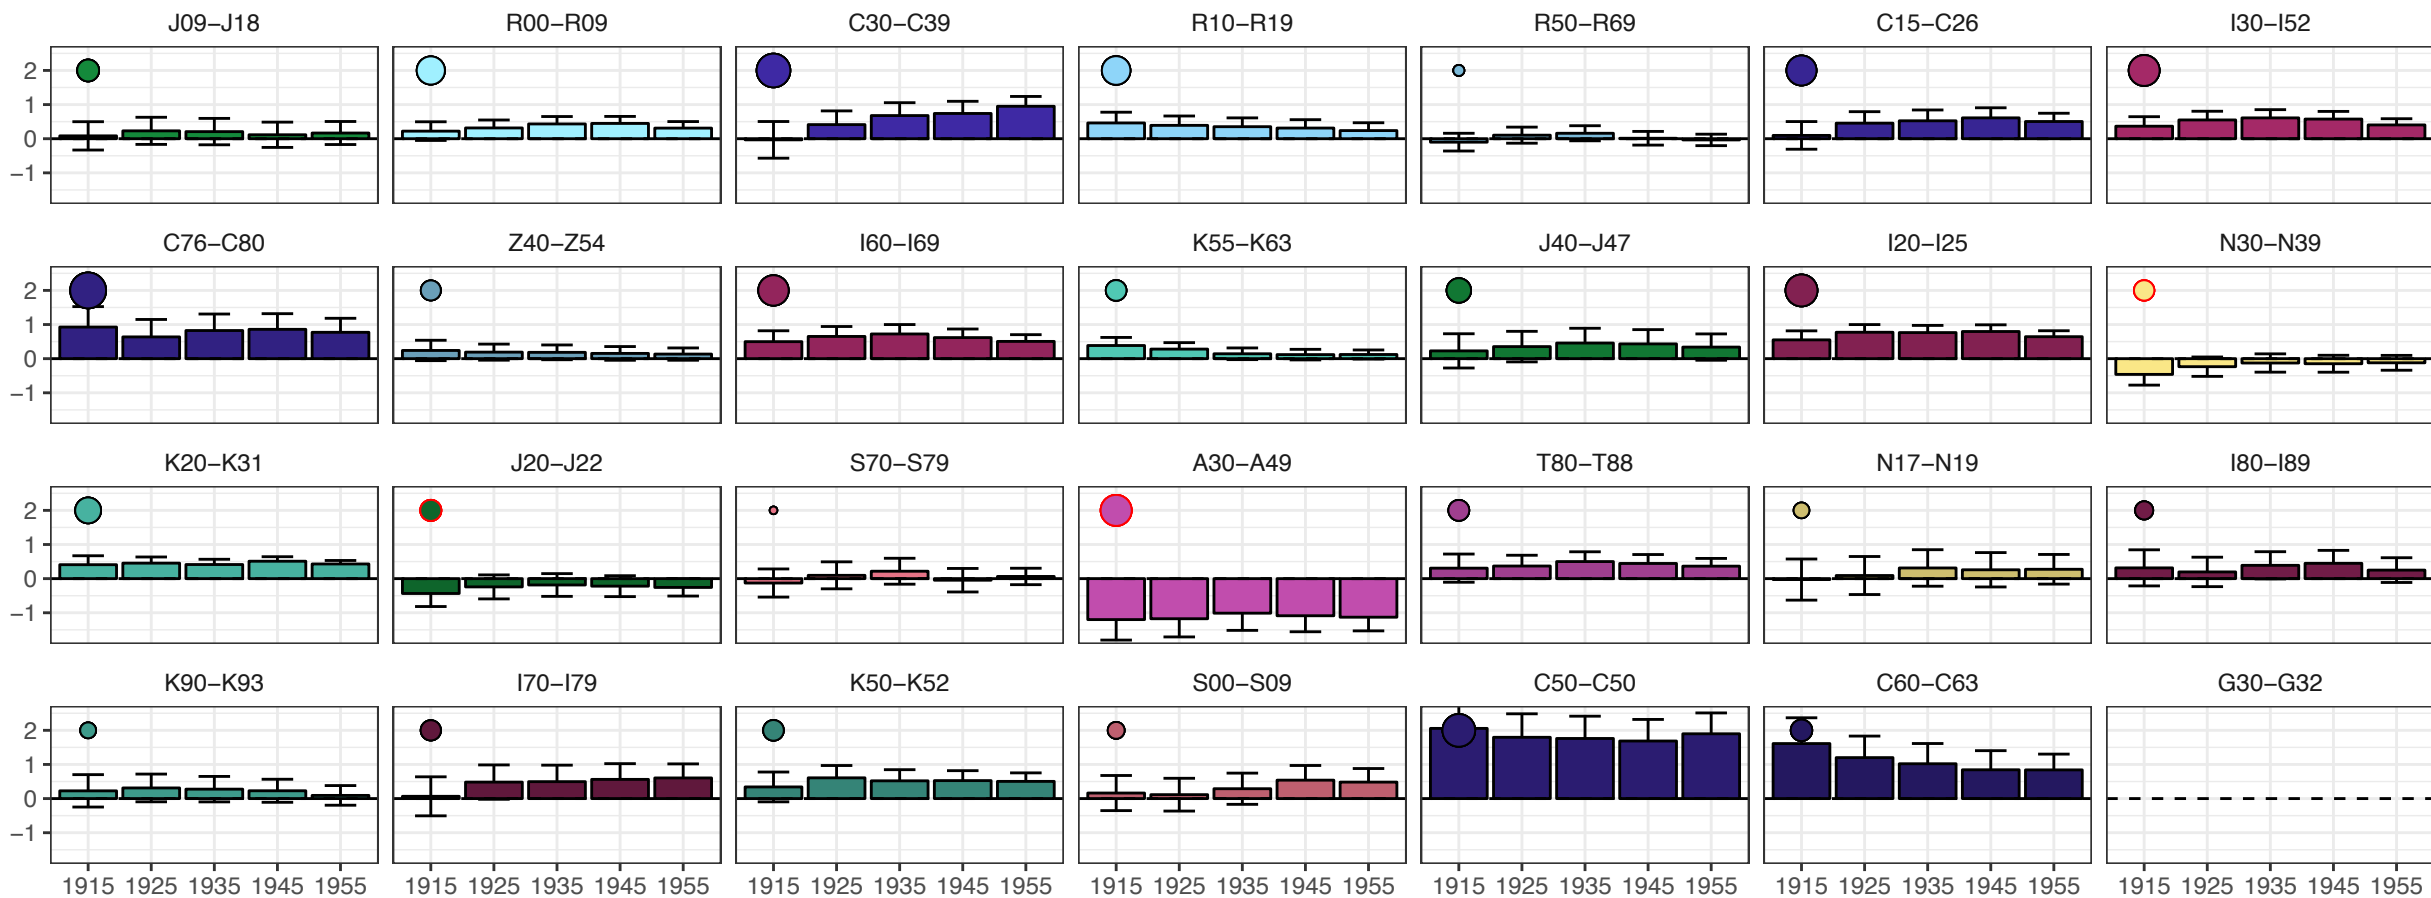

Decade of birth commencing



ACT-DTH

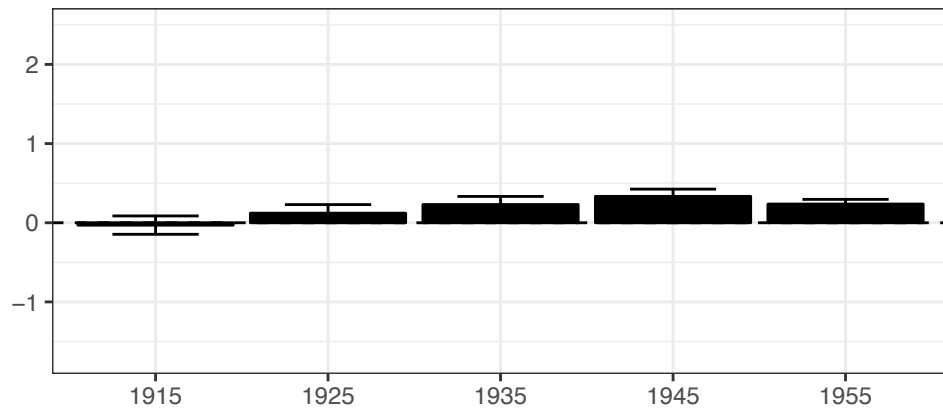

EST-DTH

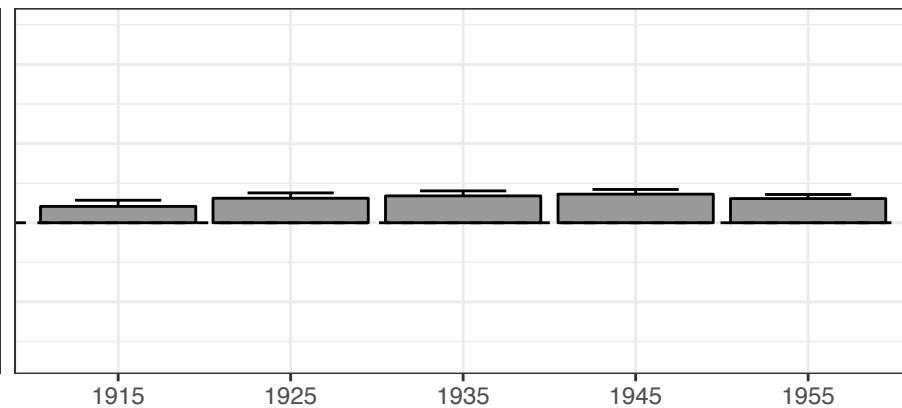

Improvements in morbidity

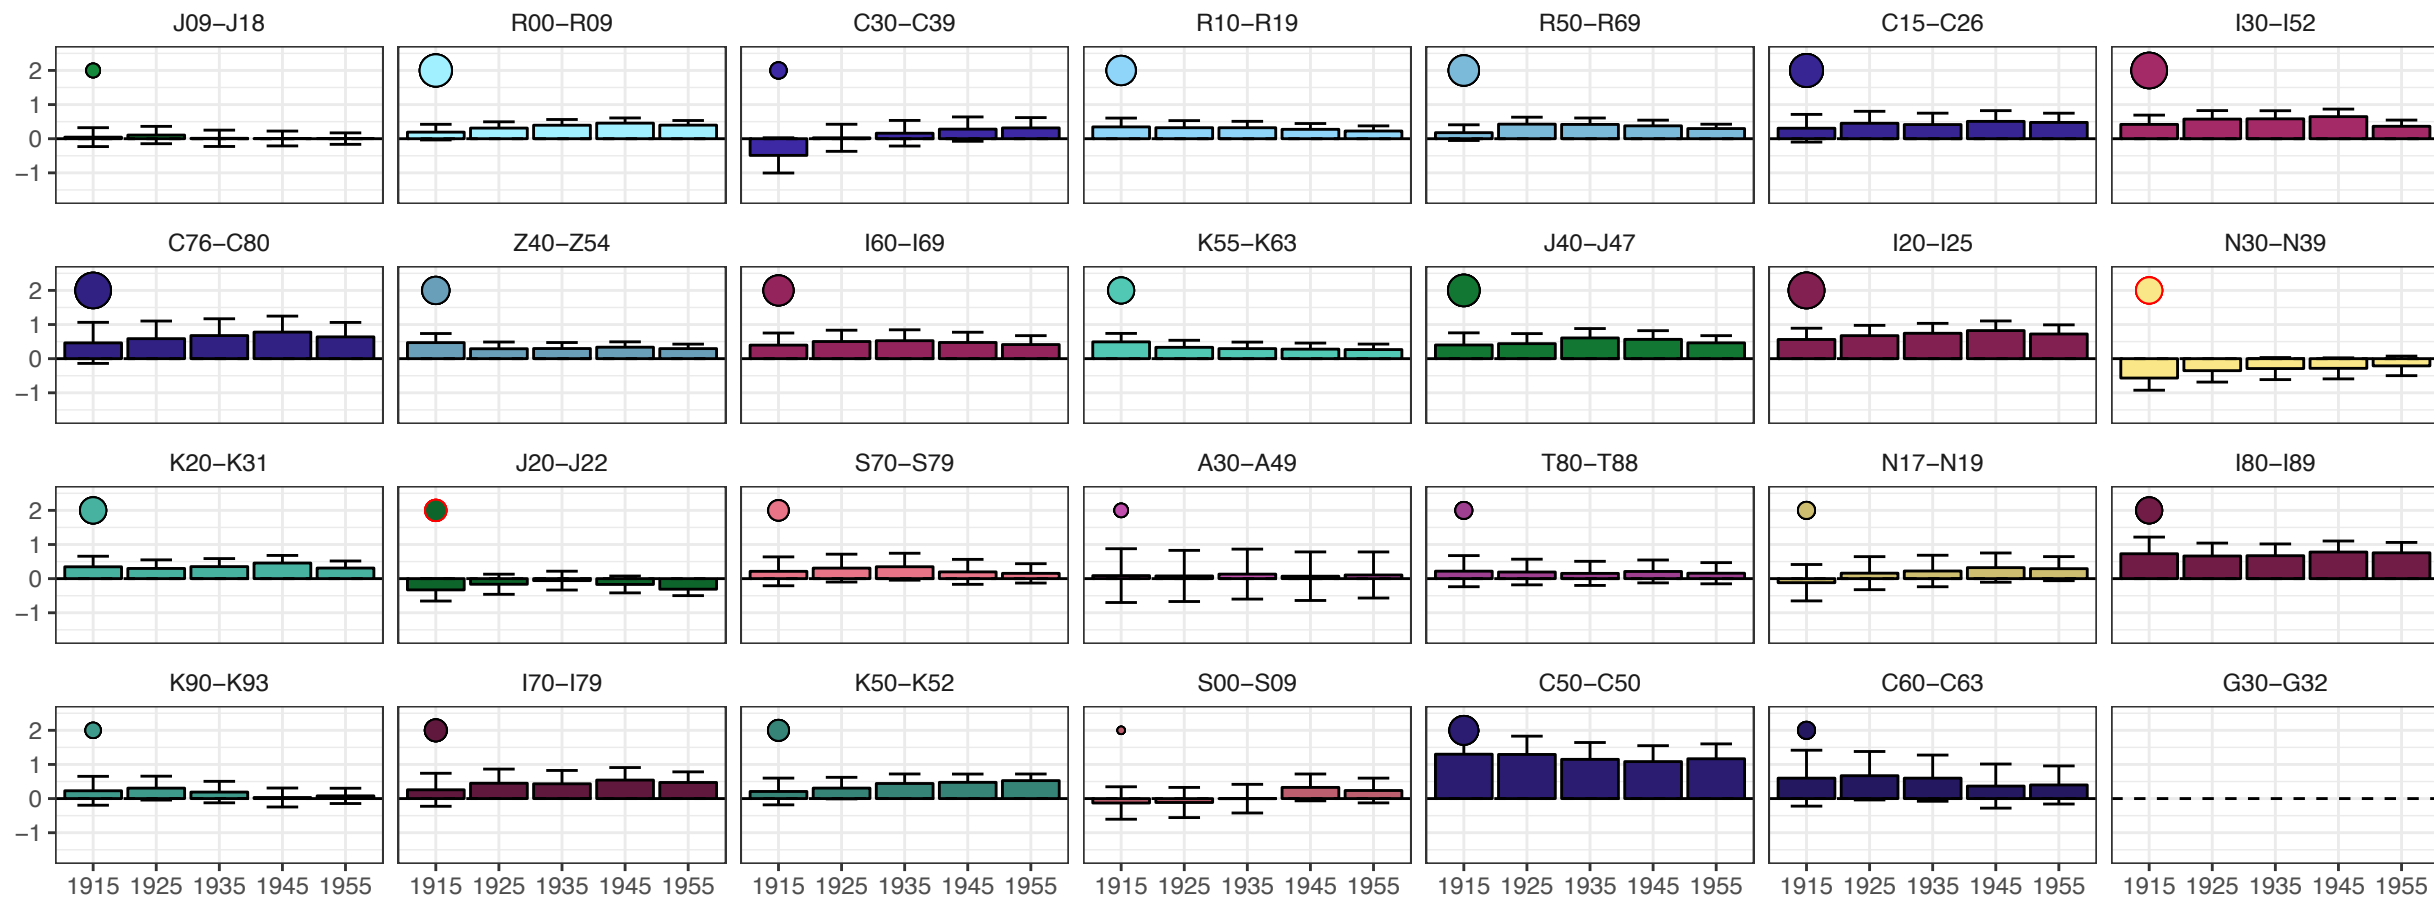

Decade of birth commencing

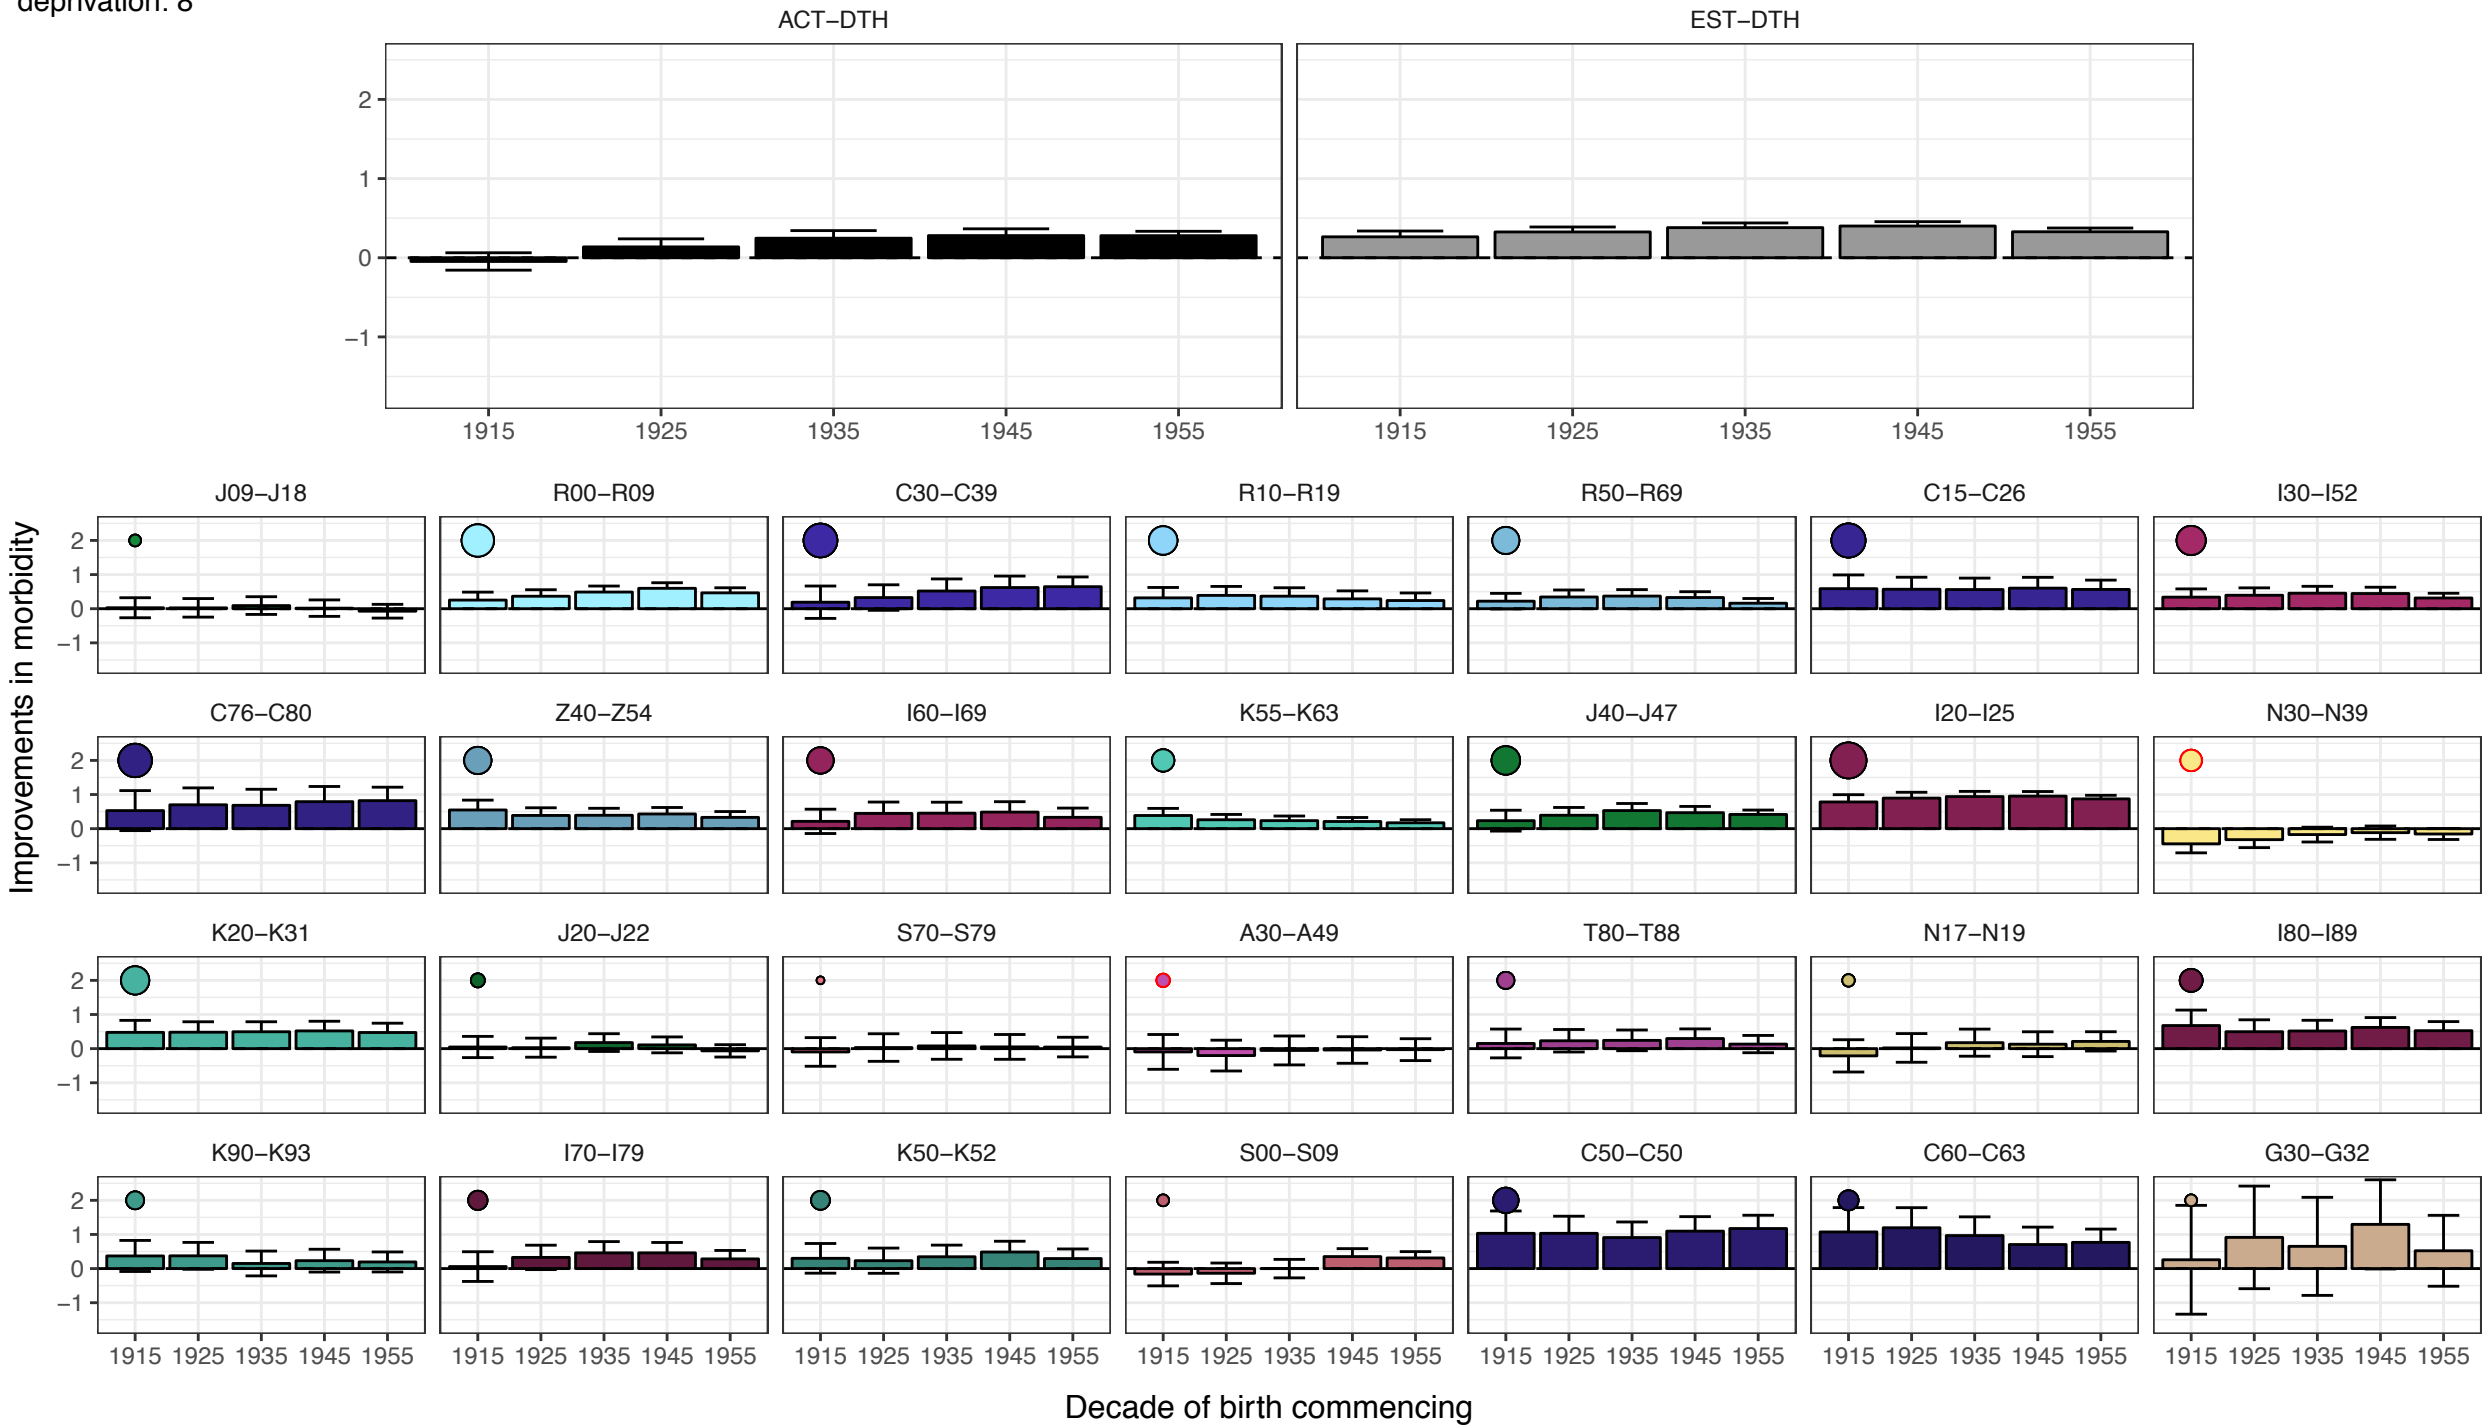

ACT-DTH

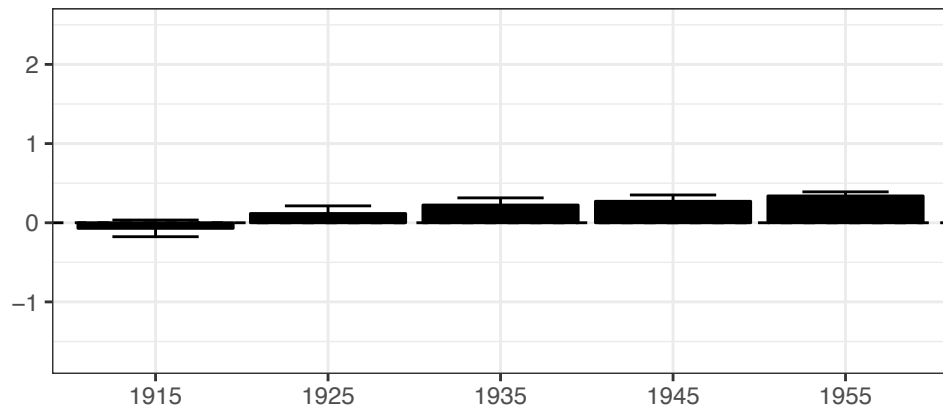

EST-DTH

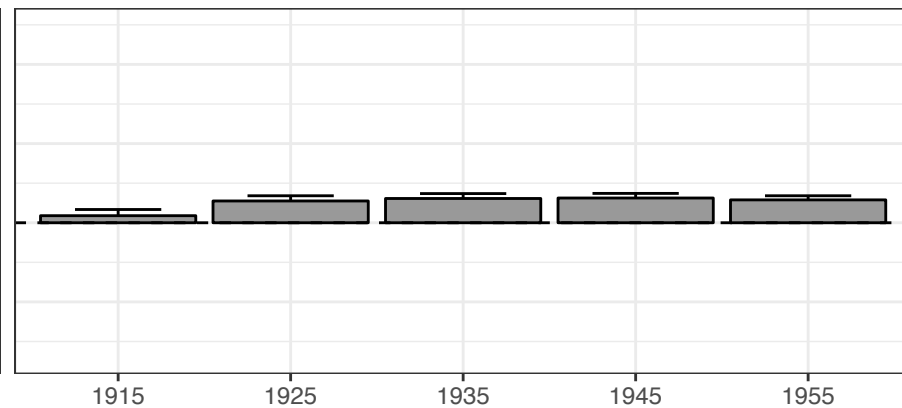

Improvements in morbidity

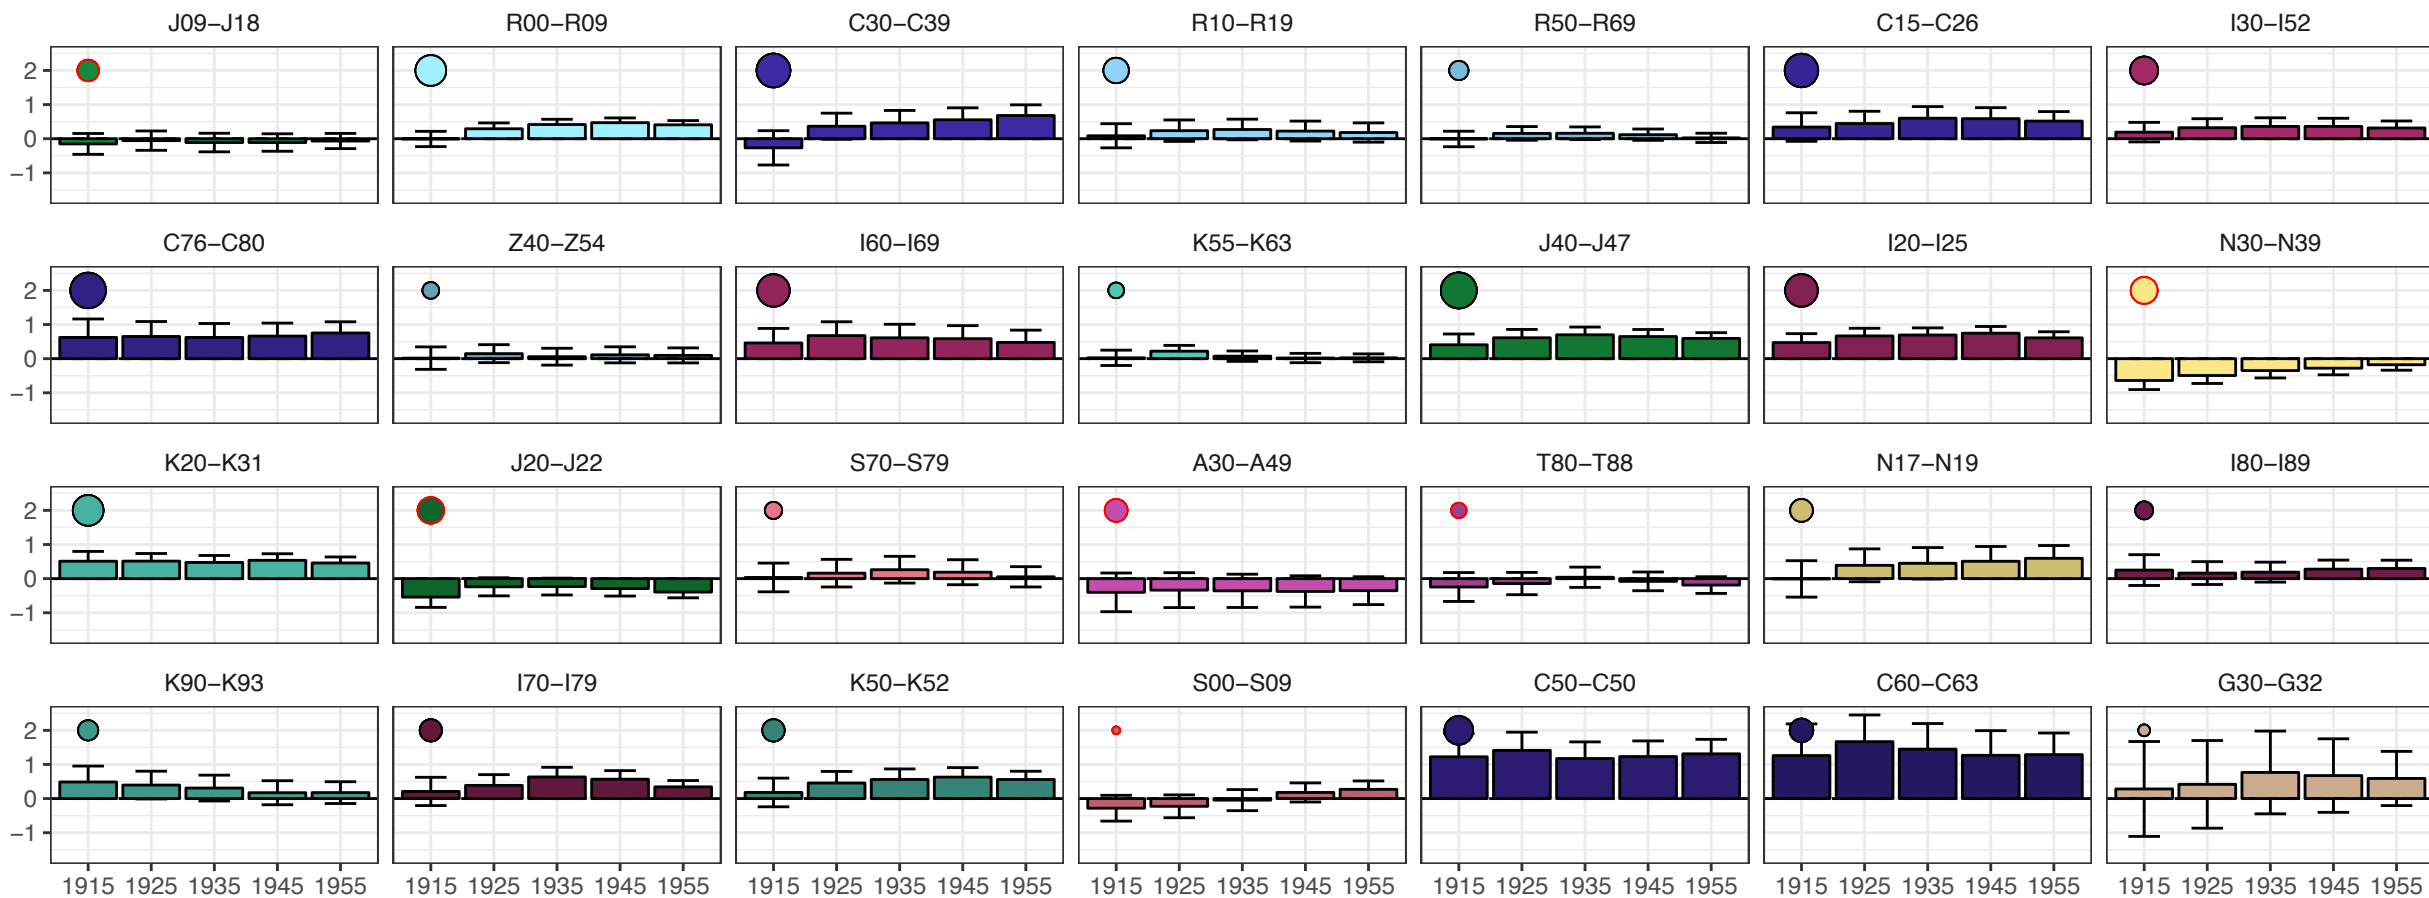

deprivation: 10

ACT-DTH

EST-DTH

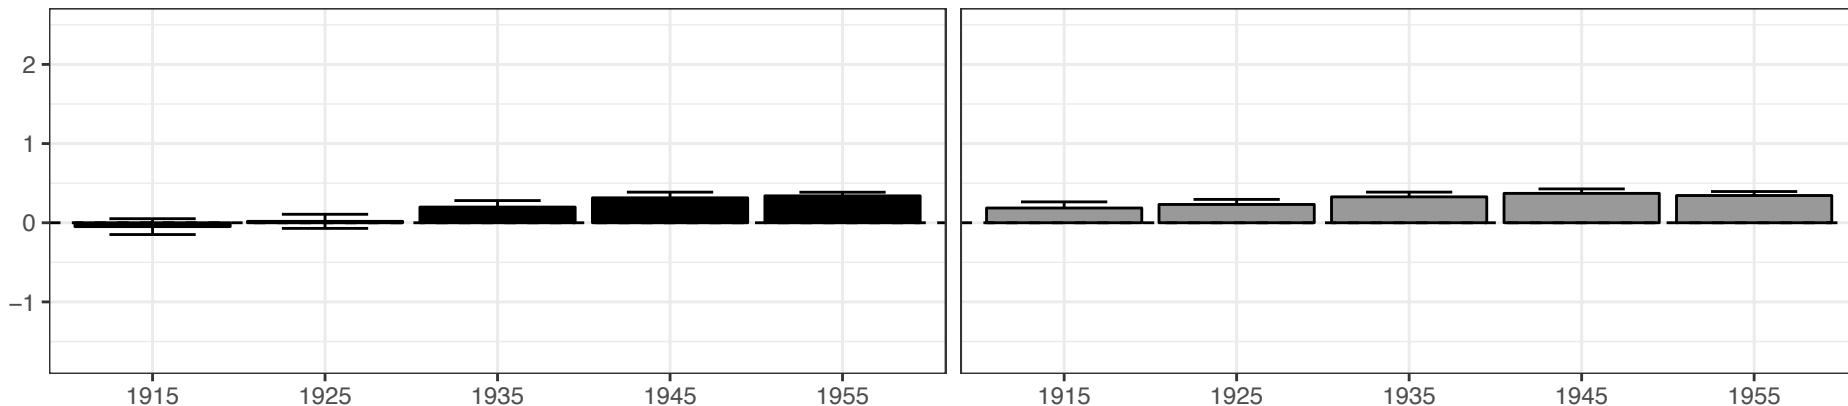

Improvements in morbidity

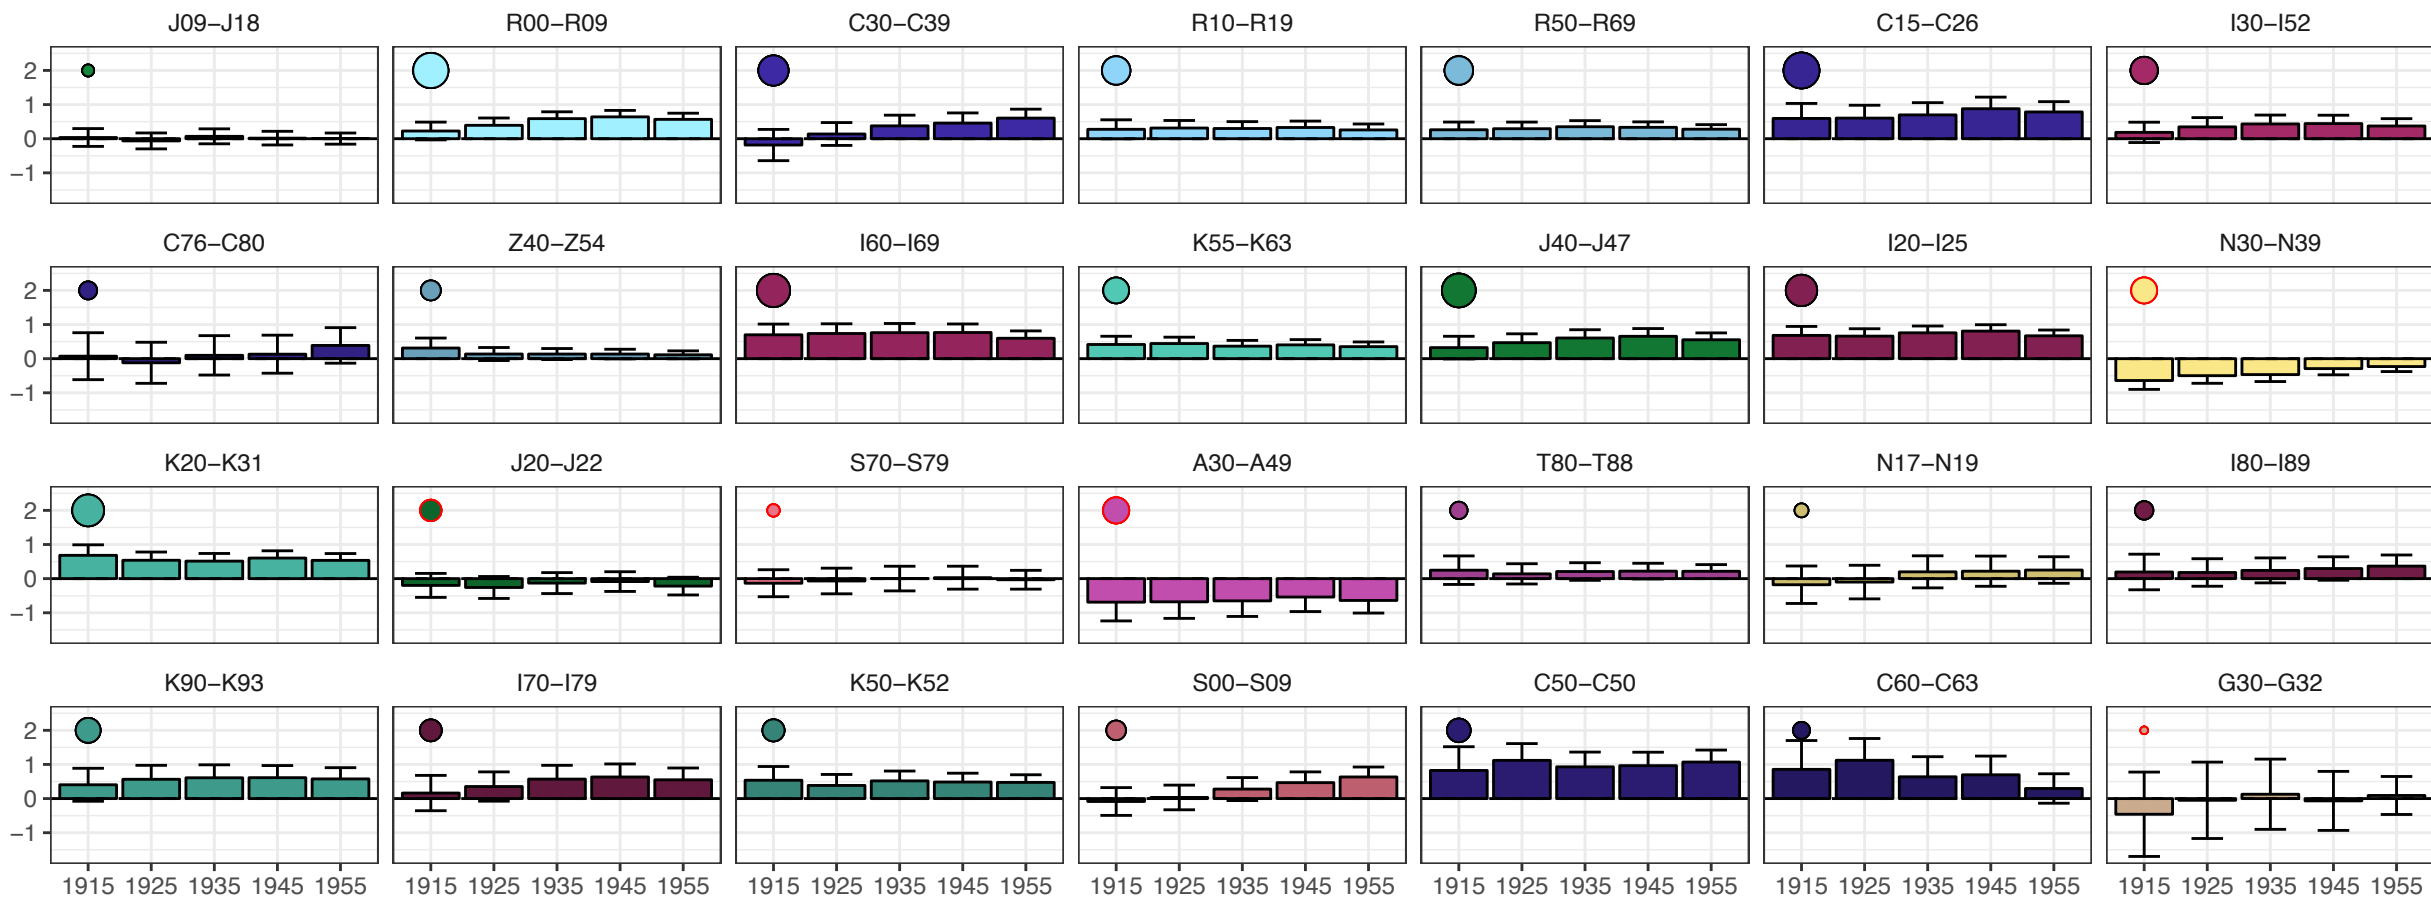

Decade of birth commencing
